# 1 Somatic maintenance alters selection acting on mutation rate

2

3 **Authors:**

4 *\*Andrii Rozhok<sup>1</sup>, \*James DeGregori<sup>1,2,3,4</sup>*

5 **Affiliations:**

6 <sup>1</sup>Department of Biochemistry and Molecular Genetics,

7 <sup>2</sup>Integrated Department of Immunology,

8 <sup>3</sup>Department of Pediatrics,

9 <sup>4</sup>Department of Medicine, Section of Hematology, University of Colorado School of  
10 Medicine, Aurora, CO 80045

11 **Emails:**

12 *Andrii Rozhok:* [Andrii.Rozhok@ucdenver.edu](mailto:Andrii.Rozhok@ucdenver.edu)

13 *James DeGregori:* [James.DeGregori@ucdenver.edu](mailto:James.DeGregori@ucdenver.edu)

14

15

16

17 **Abstract**

18 The evolution of multi-cellular animals has produced a conspicuous trend toward  
19 increased body size. This trend has introduced at least two novel problems: an elevated risk of  
20 somatic disorders, such as cancer, and declining evolvability due to reduced population size,  
21 lower reproduction rate and extended generation time. Low population size is widely  
22 recognized to explain the high mutation rates in animals by limiting the presumed universally

23 negative selection acting on mutation rates. Here, we present evidence from stochastic  
24 modeling that the direction and strength of selection acting on mutation rates is highly  
25 dependent on the evolution of somatic maintenance, and thus longevity, which modulates the  
26 cost of somatic mutations We argue that this mechanism may have been critical in facilitating  
27 animal evolution.

28 **Keywords:** somatic maintenance, longevity, body size, mutation rate, selection

29

## 30 Introduction

31 Increasing body size has been one of the major trends in animal evolution across many  
32 taxa, as formulated in Cope's rule (1, 2). The evolution of larger bodies introduces some  
33 fundamentally new evolutionary challenges. The carrying capacity of ecosystems limits  
34 biomass per group/species, so larger body size leads to reduced population size. Furthermore,  
35 large animals generally demonstrate lower reproduction rates and longer generation times. In  
36 aggregate, such changes weaken selection that can act on a population and thus negatively  
37 affect evolvability. This general reduction in evolvability should, however, be at least partially  
38 alleviated by diversity facilitated by sexual reproduction.

39 The mutation rate (MR) is another critical evolvability parameter. It is believed that  
40 selection generally acts to lower MR (3-5), and the significantly higher MRs observed in  
41 animals compared to unicellular organisms have been argued to result from the reduced power  
42 of selection imposed by small population sizes (6-8). Germline (gMR) and somatic (sMR)  
43 mutation rates are linked, as they employ the same basic DNA replication and repair  
44 machinery (9-11). While elevated gMR improves evolvability, the ensuing higher sMR should  
45 elevate the risk of somatic disorders, such as cancer (12). For cancer, increasing body size is  
46 expected to increase the frequency of oncogenic mutations by increasing the number of target  
47 cells (13). Somatic mutations also contribute to aging and a variety of aging-related diseases  
48 (14). The increased cost of sMR should thus exert negative selective pressure on gMR in  
49 larger animals.

50 Recent evidence demonstrates that the sMR in some animal tissues can be significantly  
51 higher than the rate inferred from observed mutations, because somatic purifying selection is  
52 very effective at eliminating damaged somatic cells (15). Many mechanisms, such as various  
53 tumor suppressor gene functions (including DNA damage induced apoptosis) (16), autophagy  
54 (17), purifying somatic selection (15, 18), and immune surveillance (19), should buffer the  
55 costs of somatic mutation and in aggregate promote lifespan extension by maintaining tissue

56 integrity. We will collectively call these mechanisms – the *somatic maintenance program*  
57 (SMP).

58 We present theoretical evidence from Monte Carlo modeling indicating that somatic  
59 maintenance not only improves individuals' survival for large animals by reducing sMR costs,  
60 but should have played a crucial role in animal evolution by substantially modifying selection  
61 acting on gMR. We show that positive selection for increased body size promotes positive  
62 selection for extended longevity by improving SMP. Our results also indicate that positive  
63 selection acting on traits that do not impact somatic risks also promotes selection for an  
64 improved SMP. In both cases, positive selection acting to increase gMR was observed  
65 because of the reduced sMR cost, which dramatically improved evolvability of the simulated  
66 population.

67

68

## 69 Results

70 *Theoretical introduction to the modeling.* We built a stochastic model of evolution in animal  
71 populations, incorporating reproduction and survival (**Fig. 1**), whereby each individual's trait is  
72 inherited with variance proportional to gMR (for code, see **Supplements: Section 1a**). Traits are  
73 assumed to be polygenic and exhibit phenotypic variation in the population. In particular, MR is  
74 assumed to be a highly polygenic trait, given the many genes responsible for DNA repair, DNA  
75 replication, damage avoidance (e.g. anti-oxidant defenses), and mutagen detoxification, which  
76 in aggregate can determine MR. The evolution of body size, somatic maintenance and  
77 germline mutation rate was then tracked under various regimens of selection (see also  
78 **Methods: Model algorithm**).

79 The model should reasonably approximate a sexually reproducing population. The model  
80 operates with single-parent reproduction model so that each individual descends from one  
81 parent. In this regard, technically it is tempting to view it as a model of an asexual population.  
82 However, at a higher level of abstraction the fundamental difference between sexual and

83 asexual populations (aside from the issue of purging deleterious mutations) is the amount of  
84 variation produced per the same size population per generation. Variance of inheritance in our  
85 model is too high to be assumed as being generated by mutations accumulating along a clonal  
86 lineage and equals 10% of a trait's value per generation within 95 percentile. As the modeled  
87 traits are assumed to be *multigenic* and have a continuous phenotypic range in the population,  
88 we did not need to simulate the processes of allelic segregation by recombination in order to  
89 reconstruct a sexual population. Moreover, to model allelic segregation would require  
90 assumptions regarding the number of genes and alleles underlying a trait, the dominance of  
91 these alleles, and their relative contributions to the phenotype. As such, the model only  
92 operates with the net ultimate change of a trait over generations. The assumed multigenic  
93 nature of the simulated traits also means that both segregation of alleles by recombination and  
94 aggregation of alleles by co-selection are impeded. The efficiency of allele segregation for  
95 multigenic traits is inversely proportional to the number of genes encoding a trait. We therefore  
96 assume that the net co-evolution of a pair of multigenic traits will ultimately depend on  
97 selection acting on these traits that can overcome allele segregation effects.

98 The model incorporates three major factors of mortality, including aging. Human life tables  
99 indicate that aging proceeds exponentially, whereby mortality and diseases accelerate at  
100 advanced ages (e.g. <https://www.ssa.gov>, <https://seer.cancer.gov>). The combined action of  
101 SMP mechanisms provides for an extended early period of high body fitness with little to no  
102 decline. We generalized this complex program in a curve that describes modeled animal  
103 mortality of physiological causes schematically shown in **Fig. 2A** and based on the following  
104 equation:

$$D_A = M \times e^{A^{Som}} \quad (1)$$

105 where  $D_A$  is the probability of dying of physiological causes at age  $A$ ,  $M$  is mutation rate,  
106 and  $Som$  is a composite parameter that determines SMP efficiency. The cumulative  
107 distribution function of  $D_A$ , or the probability of dying of physiological causes by age  $A$ ,  
108 resembles human mortality (**Fig. 2B**). The equation should thus provide a robust model for  
109 aging-related mortality, reflecting the extended period of high fitness and the late-life

110 accelerating mortality. **Fig. 2A** also demonstrates the relative effects of MR, which is a linear  
111 contributor, and the *Som* parameter, which stands for the total damage buffering capacity of  
112 the SMP (for details and theory see **Methods: The somatic maintenance program paradigm**). It  
113 is important to keep in mind that the *M* parameter (mutation rate) in **Eq. 1** is responsible for the  
114 somatic costs of MR (higher MR in **Fig. 2A** accelerates aging-related mortality). Improved  
115 SMP, just as body size or other trait, may come at a cost on a short evolutionary time scale,  
116 which is later diminished by further adaptation. We did not include this cost in the modeling,  
117 since if a trait responds to directional selection this means that the benefit outweighs the cost.  
118 Since the amount of change of a trait as a result of positive selection in our model is arbitrary  
119 (not exactly copying any particular natural species), we can conclude that this amount of  
120 change could already incorporate the net benefit minus cost. In other words, if the benefit of an  
121 evolutionary change exceeds its cost, then modeling benefit and cost on an arbitrary scale is  
122 mathematically equivalent to modeling only benefit.

123 *The evolution of SMP promotes selection for increased body size through better tolerance*  
124 *of MR.* In our simulations, positive selection for increased body size (**Fig. 2C, green**) led to a  
125 concurrent selection for elevated gMR (**Fig. 2D, green**) and improved SMP (**Fig. 2E, green**).  
126 Artificially blocking SMP evolution by fixing SMP at the initial value (**Fig. 2E, blue**) significantly  
127 slowed the evolution of body size (**Fig. 2C, blue;  $p \ll 0.001$** ) and triggered selection for lower  
128 gMR (**Fig. 2D, blue**). We implemented the ecosystem carrying capacity by setting a maximum  
129 biomass for the population; therefore, increasing body size led to a corresponding decline in  
130 population numbers, amplifying the power of drift (**Fig. 2F,G**). When SMP was allowed to  
131 evolve, however, the population entered a “drift zone” when its size decreased to ~4,000  
132 individuals, which shortly thereafter was overcome by selection for even larger body size,  
133 visible also by a continuing decline in population numbers (**Fig. 2F**). When we artificially  
134 blocked SMP, however, the drift zone was more profound. It occurred earlier at the population  
135 size of ~6,000-7,000 individuals, and the population was not able to escape from it (for ~1,000  
136 generations) and restore its initial rates of evolution (**Fig. 2G**), indicating an important role of  
137 SMP evolution in maintaining evolvability. We further generated a population with two

138 simulated genotypes – Genotype A that could evolve SMP (10% of the population) and  
139 Genotype B with SMP fixed at the initial value (90%). We set a maximum population size and  
140 removed the maximum biomass limit to rule out body mass effects on population size and  
141 selection, and tracked Genotype A and Genotype B frequencies under positive selection for  
142 increased body size (for code see **Supplements: Section 1b**). Despite the initial abundance,  
143 Genotype B (with fixed SMP) lost the competition in less than 200 generations, reflecting a  
144 direct competitive advantage of the capacity to evolve enhanced SMP (**Fig. 2H**). Hereafter, we  
145 will call the setting with positive selection for increased body size and freely evolving SMP and  
146 gMR the *standard condition* (usually shown in green, unless otherwise indicated) used in  
147 comparisons with other selection regimens.

148 *Abrogating selection for increased body size reduces selection for gMR and SMP.* In the  
149 absence of positive selection for increased body mass (**Fig. 3A, blue**), both gMR (**Fig. 3B, blue**)  
150 and SMP (**Fig. 3C, blue**) demonstrate early positive selection, which appeared to have been  
151 caused by rapid evolution of reproductive parameters (see **Supplement: Section 2**). Overall,  
152 gMR demonstrates a significant general decrease (non-overlapping confidence intervals (CIs)  
153 at the beginning relative to the end of the simulation), and SMP undergoes a significantly  
154 smaller improvement compared to the standard condition (green;  $p \ll 0.001$ ). Blocking the  
155 evolution of body mass (**Fig. 3D, blue**) and SMP (**Fig. 3F, blue**) expectedly led to strong  
156 selection for lower gMR (**Fig. 3E, blue**) compared to the standard condition ( $p \ll 0.001$ ), which  
157 we interpret as being driven by the sMR costs in the absence of benefits of high gMR. In other  
158 words, mutation rate is selected against because of its somatic costs and the absence of  
159 benefits of higher gMR in static conditions. In natural populations that are under stabilizing  
160 selection, gMR will have costs due to greater phenotypic variance from a well-adapted state  
161 that are independent of sMR, but we do not model stabilizing selection in this study.

162 *Decoupling sMR cost from gMR enhances the evolution of larger bodies.* To investigate  
163 the role of the putative gMR benefit versus sMR cost balance in evolution, we further  
164 decoupled gMR and sMR by allowing gMR to evolve but making sMR cost fixed and  
165 independent of gMR (see **Methods: Model variations**). Decoupling sMR cost from gMR

166 significantly accelerated the evolution of body size (**Fig. 3G, blue**) relative to the standard  
167 condition (green;  $p = 0.0052$ ), revealing that sMR costs can limit the evolution of larger body  
168 size. During the early fast evolution of body mass, gMR (**Fig. 3H, blue**) and SMP (**Fig. 3I, blue**)  
169 demonstrate a corresponding positive response. Later, further body mass evolution becomes  
170 impeded (likely because of the severe depletion in population numbers), coinciding with  
171 selection for lower gMR. SMP plateaus during this second phase at a significantly lower level  
172 compared to the standard condition ( $p \ll 0.001$ ), indicating that the somatic costs of mutation  
173 rate stimulate the evolution of more robust SMP.

174 *Selection acting on a somatic cost-unrelated trait still promotes selection for increased*  
175 *gMR and SMP.* As we have seen under blocked selection for increased body size (**Fig. 3B,C,**  
176 **blue**), SMP demonstrates an early phase of positive selection (**Fig. 3C, blue**) that is apparently  
177 reflected in a corresponding positive selection for higher gMR (**Fig. 3B, blue**). This observation  
178 suggests that both SMP and gMR may also respond to selection acting on some other traits,  
179 e.g. reproductive parameters (**Supplements: Section 2**). This raises the question whether SMP  
180 and gMR evolution would be sensitive to strong selection for a trait that does not affect somatic  
181 risks (greater body size increases the target size for somatic mutations). We simulated a  
182 condition that was similar to the standard condition, except positive selection was applied to a  
183 trait that did not affect sMR related somatic costs (see **Methods: Model variations**); e.g. if SMP  
184 improvement is solely a response to the increased sMR cost imposed by larger body, selection  
185 acting on an sMR cost unrelated trait should not drive improvements in SMP. As shown in **Fig.**  
186 **3J (blue)**, unimpeded by increased sMR costs and declining population size, the evolution of  
187 an sMR cost unrelated trait is significantly faster compared to the evolution of increased body  
188 size ( $p \ll 0.001$ ). Interestingly, gMR (**Fig. 3K, blue**) also demonstrated an early phase of  
189 positive selection during early rapid evolution of the selected trait and remains above the initial  
190 gMR throughout the entire simulation. As anticipated, SMP is positively selected; however, in  
191 the absence of an increasing sMR cost associated with larger bodies, SMP's improvement is  
192 significantly smaller (**Fig. 3L, blue**,  $p \ll 0.001$ ). Notably, even with much less enhanced SMP,  
193 gMR is still under positive selection in response to positive selection for the sMR cost



194 unrelated trait (**Fig. 3K, blue**), consistent with the sMR/gMR cost/benefit ratio being an  
195 important factor regulating selection acting on gMR. Regardless, the results demonstrate that  
196 both gMR and SMP are responsive to selection for somatic risk unrelated traits, which  
197 indicates that high mutation rate is beneficial in positively selective conditions.

198 *SMP enables maintenance of gMR when directional selection is weak.* As we have seen in  
199 **Fig. 3D-F**, in the absence of strong positive selection for increased body size and SMP  
200 efficiency, selection acts to lower gMR. **Fig. 4** shows, however, that this selection is  
201 significantly modified by the efficiency of SMP. Stronger SMPs (lower *Som* value) relax  
202 selection for lower gMR when directional selection is weak (non-overlapping CIs between the  
203 standard (red) and either of the improved SMPs). As will be explained further below, this  
204 observation may have significant implication on long-term species survival in relatively static  
205 environments.

206 *Modeling competition between a wildtype and mutator phenotypes.* Under strong positive  
207 selection, whether for increased body mass (**Fig. 2A-C, blue**) or a sMR cost unrelated trait (**Fig.**  
208 **3H,I, blue**, and **Fig. 3K,L, blue**), we observed consistent signs of positive selection for higher  
209 gMR. However, because gMR and sMR are linked, higher gMR is a trait that should negatively  
210 impact individual fitness and therefore be under negative selection. To investigate this  
211 question, we mixed two simulated genotypes, one “wild-type” (50%) and one “mutator” (50%)  
212 in a population of stable size and under positive selection for a sMR cost unrelated trait. We  
213 then observed the genotypes’ frequencies in the population using varying strength of mutators.  
214 **Fig. 5A** demonstrates that while the mutator’s fitness initially is lower compared to wild-type,  
215 eventually the mutator outcompetes its wild-type counterpart. Interestingly, with increased  
216 mutation rate, the magnitude of the mutator’s initial decline increases, but so does the speed at  
217 which it subsequently overtakes the population. This result provides a clue for how higher  
218 mutation rate, being a trait with negative impact on fitness, can be selected for. Because net  
219 organismal fitness is a composite trait impacted by the fitness value of many individual traits,  
220 the initial fitness of the “mutator” is lower because, all other traits equal, higher MR incurs  
221 increased sMR cost. However, in response to selection, mutator is capable of more rapidly

222 developing other (adaptive) traits (**Fig. 5B**) and thus its overall fitness soon becomes higher  
223 compared to wild-type.

224

## 225 Discussion

226 Our study demonstrates that positive selection for increased body size triggers a  
227 concurrent selection for improved somatic maintenance to mitigate the increased somatic risks  
228 of larger bodies. Improved somatic maintenance, in turn, promotes selection for higher  
229 germline mutation rates by reducing the cost of somatic mutations and thus altering the  
230 sMR/gMR cost/benefit ratio. Conditions of strong positive selection for somatic cost  
231 independent traits, as our model shows, can also alter this balance by elevating the benefits of  
232 higher gMR. Under stable conditions, alternatively, the sMR/gMR cost/benefit balance is  
233 altered by the existing cost of somatic mutations and by the increased cost and  
234 absent/reduced benefits of gMR itself, which ultimately favors lower mutations rates. Under  
235 stasis, gMR exerts a cost independent of somatic risks by increasing deviation of progeny  
236 phenotypes from population mean/median and thus reducing their fitness. Our study thus  
237 demonstrates that the evolution of mutation rate is not under a universal population size-  
238 dependent selection acting to lower it, but is highly tunable and governed by selection acting  
239 on other traits. Importantly, our modeling indicates that under certain conditions elevated  
240 mutation rate, unlike perhaps any other trait, can be positively selected despite its negative  
241 effects on individual fitness (as explained in **Fig. 5**).

242 Mutation rate in eukaryotes is a highly polygenic trait encoded by multiple genes involved  
243 in DNA replication, repair, damage avoidance, and cell division machineries (*9, 11*). Animals  
244 mostly reproduce sexually, which should generate an extensive population allelic diversity for  
245 these genes. This diversity should provide for a relatively continuous distribution of mutation  
246 rate in populations, rather than being a uniform trait marked with sporadic monogenic mutants,  
247 as may occur in asexual populations (*20-22*). Such intra-population variation (*23, 24*), as well  
248 as the ability of mutation rate to rapidly evolve (*25*), has been shown for humans . However,

249 sexual reproduction would be supposed to effectively segregate alleles contributing to mutation  
250 rate from alleles for other (e.g. adaptive) traits. It has been argued based on other evidence  
251 that the efficiency of such segregation in sexual populations is limited (26). In particular, as  
252 argued in **Theoretical introduction to the modeling**, the multi-genic nature of the gMR trait  
253 should substantially slow segregation of gMR from other traits.

254 It also appears from our results that animal evolution, with the macroscopic trend toward  
255 larger bodies, should have driven a concurrent evolution of extended longevity, the latter being  
256 determined by the efficiency of species-specific somatic maintenance programs. Even though  
257 extended longevity tentatively appears to be a benefit on its own, e.g. due to extended  
258 reproduction period, our model demonstrates that somatic maintenance (and thus longevity) is  
259 under a much weaker positive selection in the absence of other positively selected traits. This  
260 observation can explain why extended longevity demonstrates significant deviations across  
261 animal taxa from the general rule larger body → longer lifespan. Our results indicate that the  
262 evolution of longevity (as a function of somatic maintenance efficiency) should be greatly  
263 impacted by the rate of evolution of other traits, and not necessarily body size.

264 Interestingly, our study predicts an important evolutionary role for the mechanisms of  
265 somatic maintenance in addition to their evolution as a means of improving individual survival  
266 of large animals (13, 18). Our results demonstrate that selection for enhanced somatic  
267 maintenance goes well beyond the evolution of body size and is promoted by strong directional  
268 selection acting on any trait. This result indicates that SMPs may have had an important role in  
269 the evolution of large animals. Selection for higher gMR following improved SMP may be an  
270 important mechanism “rescuing” the reduced evolvability imposed by reduced population size,  
271 extended generation times and lower reproduction rates. Therefore, SMPs and longevity may  
272 have an important contribution to species’ long-term survival. For example, a prolonged  
273 evolutionary stasis (27-30) should trigger selection for lower mutation rates. By relaxing  
274 selection for lower mutation rate and thus maintaining evolvability (as shown in Fig. 4),  
275 enhanced SMPs can ensure better survival of animal groups facing rapid evolutionary  
276 transitions or drastically changed environments after such relatively static periods. All other

277 traits equal, species with extended longevity may survive such transitions with higher  
278 probabilities.

279 Lynch and colleagues have provided extensive arguments supporting the idea that the  
280 higher MRs in animals compared to unicellular organisms are likely to be caused by reduced  
281 population sizes that limit the ability of selection to lower mutation rate ( $\delta$ ). In conjunction  
282 with population size, in large animals the strength of selection will be further attenuated by  
283 lower reproduction rates and extended generation times. Based on our results, Lynch's theory  
284 can be extended by recognizing that somatic maintenance programs (and longevity) should  
285 have substantial influence on the general relationship between population size and mutation  
286 rates, and on the strength and directionality of selection acting on mutation rates. For example,  
287 in our simulation, populations of the same initial size but with different SMP efficiencies  
288 demonstrate profound differences in the effects of population size driven weakening of  
289 selection (Fig. 2F,G, as well as discrepant selection for mutation rates (Fig. 2D).

290 Selection for higher mutation rates has been shown experimentally in bacteria (20-22, 31),  
291 whereby engineered or spontaneous mutants with higher mutation rates have been shown to  
292 have advantages over wild-type under positively selective conditions. The "mutator hitchhiker  
293 hypothesis" explains such selection by the higher probability that adaptive mutations will  
294 appear in a mutator cell (22). Once such a mutation occurs, the mutator genotype spreads to  
295 fixation by being genetically linked to the adaptive phenotype. Modeling studies demonstrate  
296 that evolution of evolvability, including varying selection on mutation rates, should be possible  
297 in sexually reproducing organisms (26, 32, 33). Yet robust experimental corroboration of such  
298 a possibility appears to be lacking.

299 In conclusion, our results raise the question of whether the evolution of large body size in  
300 animals would be possible without such a complex pattern of selection acting on mutation rate,  
301 and whether such a complex relationship is necessary to explain the evolution of large  
302 animals. The evolution of large bodies has entailed the cost of losing the ability to evolve via all  
303 major parameters that define this ability, such as population size, reproduction rate and

304 generation time, except mutation rate (which increased). Therefore, one scenario could have  
305 been that this cost has been so prohibitive for many species that positive selection for mutation  
306 rate was necessary to allow evolution of large animals. Alternatively, mutation rate could have  
307 been high enough to maintain evolvability at the selection/drift barrier point where selection  
308 was no longer able to reduce it further ( $\delta$ ). Understanding which of these scenarios prevails in  
309 the evolution of large animals requires more research.

310

311

## 312        **Methods**

313        **Software.** The model was created and all simulations were run in the Matlab environment  
314        (MathWorks Inc, MA) version R2014a.

315        **Model algorithm.** The model is a stochastic Monte Carlo type model (the exact algorithm can  
316        be found in **Supplements: Section 1a**) that runs a total of 1,005,000 updates (“time” in arbitrary  
317        units, AU) unless otherwise stated, which represents ~1000 generations of the simulated  
318        animal population (see **Fig. 1** for the flow chart). The simulation starts with building an initial  
319        population of 10,000 individuals. Each individual has a number of simulated traits: 1) ID, which  
320        is 1 (monogenotypic population) or 1 and 2 (in experiments with competition between two  
321        genotypes in a mixed population to indicate genotypes); 2) current age, which increments by 1  
322        at each simulation update; 3) inherited body mass, which is inherited with variation by an  
323        individual and will be reached by adulthood (at age ~1000) and equals 5000 AU in the initial  
324        population; 4) current body mass, which changes during individual growth, following a growth  
325        curve, and plateaus at the inherited body mass in adults; 5) inherited birth mass, which in  
326        individuals of the initial population is 300 AU; 6) inherited mutation rate of  $10^{-9}$  AU (explained  
327        below); 7) inherited reproduction rate, which is the period with variation between successive  
328        reproductions in adult individuals and equals ~600 in the initial population; 8) inherited litter  
329        size (initially 1), which is the number of progeny produced per individual per reproduction; 9)  
330        inherited parameter of somatic maintenance, which determines the strength of the somatic  
331        maintenance program as further explained below; 10) age of first reproduction, which dictates  
332        that an individual begins reproducing when its current body mass reaches 0.9693 of its  
333        inherited adult body mass (the number is derived so that in the initial population maturity is  
334        reached at age ~1000 based on the growth curve).

335        Each inherited trait varies in progeny relative to parental. This variation was produced by  
336        multiplying the inherited mutation rate by the parameter of inherited variance (*inhvar* =  
337        250,000,000) and the product was used as the standard deviation (STD) of the normally  
338        distributed variation in inheritance. This transformation was not necessary, as the *inhvar*  
339        parameter is constant throughout simulation and it simply determines the magnitude of the  
340        mutation rate’s effects in the germline, which is imaginary and in the initial population simply

341 produces  $0.000000001 \times 25,000,000 = 0.025$  that serves as the STD parameter for the normal  
342 distribution from which inheritance variation is drawn. However, we kept this two-parametric  
343 model for inheritance because mutation rate is also separately used in the equation of the  
344 somatic maintenance program (as will be explained later).

345 Each newborn individual grows, reaches maturity, then reproduces over the rest of its lifetime  
346 and eventually dies. The model is asynchronous, so that at every time-point of the simulation  
347 the population contains individuals of various ages whose lifecycles develop independently.

348 And finally, three factors of mortality were modelled in the simulations. First, at every timepoint  
349 of the simulation, an individual could die of somatic causes with a certain probability. This  
350 probability is small at the beginning of life (but still can be caused by some imaginary inherited  
351 genetic defects) and increases exponentially with age based on the paradigm of the aging  
352 curve, which is primarily determined by an individual's inherited somatic maintenance program  
353 (SMP). In humans, the aging curve also depends on lifestyle, however we assume in this  
354 model that in a wild animal population lifestyle distribution is sufficiently uniform to be  
355 neglected. More detailed description of the somatic maintenance paradigm that we applied will  
356 be explained further below. Secondly, the simulated animals had a chance of dying of external  
357 hazards, such as predators. We applied the Lotka-Volterra model of predator-prey interactions  
358 (*34, 35*) to implement the dynamics of predator pressure (effectively the chance of dying of an  
359 external hazard cause per timeunit). Here we should mention that smaller individuals and  
360 juveniles had higher chances of dying of external hazards, which effectively created positive  
361 selection for increased body size and also reflected the typical high mortality rates among  
362 juveniles observed in natural populations. And lastly, individuals could die of intra-specific  
363 competition. We implemented such competition by setting the upper limit of population's total  
364 biomass, which in nature is imposed by the ecosystem's carrying capacity. Therefore, in the  
365 simulated population biomass produced over the biomass limit caused additional mortality, so  
366 that stochastically, population total biomass never exceeded the limit. Larger individuals also  
367 had lower probability of dying of intra-specific competition, based on the assumption that  
368 competition for resources and mates (the failure to reproduce is effectively an evolutionary  
369 death) will typically favor larger individuals and this should have been one of the forces that  
370 has been driving the macroscopic animal evolutionary trend towards increasing body size. The

371 advantage of size in this mortality model also created additional positive selective pressure for  
372 body size. The total age-dependent mortality of all causes in our model did approximate a  
373 typical wild animal mortality curve (**Supplements: Section 3**).

374 **The somatic maintenance program paradigm.** In order to replicate natural mortality caused by  
375 physiological aging, such as cancer, decreased immune defense and lower ability to avoid  
376 predators or to succeed in intra-specific competition, we made use of the aging curve, or  
377 somatic maintenance, concept. Modern humans (in developed nations) and captive animal  
378 mortality curves (**Fig. 2B** for human) differ from wild animal mortality curves in very high early  
379 life survival with most mortality significantly delayed into advanced ages (36, 37). This  
380 difference is caused by many reasons, such as much lower mortality caused by external  
381 hazards and better nutrition and general healthcare. It therefore can be assumed that the  
382 human and captive animal mortality curves are close representations of the physiological aging  
383 curve. As longevity depends on multiple mechanisms of maintaining the soma, we can also  
384 call this curve *the somatic maintenance curve*. In order to reconstruct this curve, we assumed  
385 that somatic maintenance depends on the interaction of two opposing forces: 1) the  
386 accumulation of genetic and structural damage in the soma that promotes aging and 2) the  
387 somatic maintenance program consisting of a number of mechanisms that prevent or buffer  
388 the effects of genetic and structural damage. The exact mathematical relationship between  
389 these two forces and age is not known, however an example of cancer development can be  
390 used as a proxy to explain the equation we derived for it.

391 Oncogenic mutations (including oncogenic epigenetic changes) are the ultimate necessary  
392 condition for cancer to develop. The frequency of oncogenic mutations linearly depends on  
393 mutation rate on a per cell division basis. Therefore, we assume that linear changes in  
394 mutation rate will have linear effects on the odds of the occurrence of oncogenic mutations. An  
395 oncogenic mutation provides the initiated cells with a linear change in their fitness relative to  
396 normal cells. However, over time an advantageous clone with a constant linear fitness  
397 advantage will proliferate exponentially. Therefore, we can already assume that mutation rate  
398 should have a linear effect on the cancer curve, while time/age adds an exponential  
399 component revealed in an exponential growth of a tumor. We can reasonably assume further  
400 that a strong SMP will efficiently suppress such a clone, slowing or even preventing its growth



401 (38). A weaker SMP will allow the clone to proliferate faster. Therefore, SMP strength can  
402 modulate the effects of mutations and time on cancer risk. The exact relationship between  
403 SMP strength and physiological risk factors is not known. However, we know that their  
404 interaction leads to a net exponent in physiological decline and disease risk.

405 We therefore reconstructed the human aging curve by maintaining the general principal  
406 relationship between these factors as shown in Eq. 1. As seen from the equation, mutation rate  
407 is a linear contributor to aging. Age itself contributes exponentially, and the somatic  
408 maintenance composite parameter *Som* is, in turn, in power relationship to age. The  
409 cumulative distribution function of  $D_A$  (Eq. 1) produces  $D(A)$  – the probability of dying of  
410 somatic/physiological causes by age  $A$  and yields a shape close to the human mortality curve  
411 (Fig. 2A,B). We cannot claim that these three factors are in the exact relationship predicted by  
412 Eq. 1, as it is unknown. As seen in Fig. 2A, changes in the *Som* parameter have substantially  
413 greater effects on the resulting mortality curve than mutation rate, with mutation rate still  
414 having a sizeable effect as well. Yet claims are still made (e.g. (39)) that mutation rate is a  
415 larger factor in aging than we assume in this model. Validation of our assumption in general  
416 comes from the body of solid evidence that up to 50% of mutations in humans accumulate  
417 during body growth by the age 18-20 (40-42). If mutation accumulation had a significant effect  
418 on aging on its own, we should age rapidly until age 18-20 (half-way) and then the rate of  
419 aging should decelerate. However, in reality the opposite happens, indicating that the  
420 combined strength of the SMP has an overpowering effect in modulating the effects of genetic  
421 damage on aging. As a result, we reason that Eq. 1 might reasonably approximate the natural  
422 relationships of these three factors. Therefore, based on an individual's aging curve we  
423 calculated the  $D_A$  parameter at each simulation time-point (using the individual's mutation rate,  
424 age and *Som* parameter) and applied it in a binomial trial as the probability of that individual's  
425 dying of somatic/physiological causes in an age-dependent manner. As further explained in  
426 **Supplements: Section 4**, the exact relationship between the *Som* parameters and each of the  
427 other two (mutation rate and age) has no effect on the model, as the model represents SMP  
428 and its variation by using area under the mortality curve. Therefore the sole purpose of Eq. 1 in  
429 the model is to generate an age-dependent curve of physiological mortality whose cumulative

430 function (probability of dying by a certain age) resembles in shape the human mortality/aging  
431 curve (see **Supplements: Section 4** for detailed explanation and illustration).

432 **Model variations.** A number of model variations used in simulation experiments are  
433 employed. *Fixed trait values* involved simply fixing the initial trait value without inherited  
434 variation throughout the entire simulation. *Dislinking of somatic and germline mutation rate* was  
435 done by making the value  $M$  in **Eq. 1** independent of an individual's mutation rate, which  
436 resulted in somatic costs independent of transgenerational variation of mutation rate  
437 (effectively from germline mutation rate). *Selection for a trait that did not affect somatic risks*  
438 was achieved by transforming the “body mass” trait's effects by removing the trait from  
439 calculations of the risk of death by somatic causes (unlike body size, it did not influence the  
440 risk), then removing the population biomass limit and setting maximum population size (unlike  
441 body mass, other traits do not directly affect population numbers) and fixing the growth rate  
442 curve so that it reached the initial body mass of 5,000 AU (the current body mass parameter in  
443 the model; the inherited body mass variation did not exist and the inherited body mass  
444 parameter was replaced with the somatic risk unrelated trait). These manipulations made the  
445 selected trait a proxy for a trait unrelated to somatic risks (e.g. hair color). *Competitive assays*  
446 included individuals with different ID parameters, such as 1 and 2 to indicate different  
447 “genotypes”; traits of the “genotypes” then were tracked and stored separately.

448 **Data processing.** Processing of primary data included removal of outliers (see  
449 **Supplements: Section 5**). Occasionally the simulations generated “NaN” (not a number) values  
450 in individual parameters, which were rare but quickly propagated if left in the population. We  
451 immediately deleted individuals from the population if “NaN” values appeared in any of their  
452 parameters. Based on the rarity of such events, we can assume that they had the effect of rare  
453 early lethal mutations and affected the population at random. Thus, we assume these did not  
454 affect the principal results.

455 **Statistics and data presentation.** Most simulation experiments were made with 25 repeats.  
456 Due to heavy skews in sample distributions (inferred by D'Agostino-Pearson test for normality  
457 of a distribution), all figure panels represent medians (thick lines) and 95 percentiles on each

458 tail (color-shaded areas). Statistical differences between experimental conditions were  
459 calculated as follows. We first calculated the sum of all values in each run throughout the  
460 entire evolution of a trait (typically 1,005,000 time points). In this way, given the small  
461 increment over a long time the sum essentially approximated the area under the curve of a  
462 trait's evolution. These sums (usually 25 repeats in one experiment/sample) were then  
463 compared by applying the Matlab implementation of the Wilcoxon rank sum test, which is  
464 considered equivalent to the Mann-Whitney U-test. P-values  $\leq 0.05$  were considered as  
465 indicating significant difference.

466

467

## 468 Supplementary Materials

469

### 470 Section 1. Model code.

#### 471 *a. General model for positive selection for body size*

```
472 for iteration = 1 : 25
473     disp(iteration);
474
475     newrun = true;
476
477     if(newrun)
478         clearvars -except newrun iteration
479         fname = 1;
480         timeun = 1;
481         iter = 1;
482
483         % OUTPUT STORAGE MATRICES
484         sommortality = []; % counts of mortality for somatic reasons
485         extmortality = []; % counts of mortality caused by external hazard
486         capmortality = []; % counts of mortality imposed by ecosystem's
487                             % carrying capacity (intra-specific competition)
488         biomassdyn = []; % population biomass dynamics over time
489         popsizedyn = []; % population size dynamics over time
490         births = []; % counts of new births over time
491
492         bodymassevol = []; % population's average bodymass over time
493         birthmassevol = []; % population's average birthmass over time
494         littersizeevol = []; % population's average litter size over time
495         mutrateevol = []; % population's average mutation rate over time
496         rrateevol = []; % population's average reproduction rate over time
497         lifespanevol = []; % population's average somatic maintenance
498                             % coefficient over time
499
500     else
501         timeun = timeunit + 1;
502         if(fname == size(filenamees, 2))
503             fname = 1;
504         else
505             fname = fname + 1;
506         end
507     end
508     filenamees = ['a' 'b' 'c' 'd' 'e' 'f' 'g' 'h' 'i' 'j' 'k' 'l' 'm' 'n'...
509                 'o' 'p' 'q' 'r' 's' 't' 'u' 'v' 'w' 'x' 'y' 'z'];
510
511
512
513
514     % GENERAL MODEL PARAMETERS:
515     totaltime = 1005000; % total # of simulation updates ("time")
```

```
516 popsize = 10000; % initial population size
517 mutrate = 0.000000001;
518 inhvar = 25000000; % a multiplier of mutation rate determining
519 % variance in trait inheritance (var=inhvar*mutrate)
520 % so that inheritance variance is proportional to
521 % mutation rate
522 bodymass = 5000; % initial adult body mass
523 birthmass = 300; % initial body mass at birth
524
525 repbodymass = 0.9693; % multiplier determining at what body mass
526 % as a fraction of the individual's inherited
527 % adult body mass the individual begins to
528 % reproduce
529 rrate = 600; % initial time (in # simulation updates)
530 % between successive reproductions
531 littersize = 1; % initial # progeny per reproduction per individual
532 littervar = (0.1*littersize)/littersize; % variance of littersize
533 rratevar = (0.1*rrate)/rrate; % variance of reproduction rate
534 growthrate = 57; % coefficient of body growth rate
535
536 somdeath = 0.34; % an exponential coefficient of the somatic maintenance
537 equation
538 somEnergy = 2231.81365913237; % initial energy invested in somatic
539 % maintenance when somdeath=0.34
540 % see SUPPLEMENTS
541
542 aging = mutrate*exp([1:1000000].^somdeath); % the aging function -
543 % probability of dying for somatic reasons over time
544
545 risk = cumsum(aging); % cumulative sum function of the aging curve
546 [c riskage] = min(abs(risk-1)); % riskage - age at which risk = 1;
547 % explained in METHODS
548
549
550
551 %INITIAL BODY GROWTH FUNCTION
552 growthcurve = [birthmass]; % curve for body size distribution in the initial
553 population
554 % initial population is generated with ages
555 % ranging from 1 to riskage, they are
556 % assigned their current body mass according
557 % to growthfunction
558 for i = 2 : riskage
559     growthcurve(i) = growthcurve(i-1) + 0.3*growthrate*(1 - (growthcurve(i-
560 1)/bodymass));
561 end
562
563 [c reprodage] = min(abs(growthcurve - (bodymass*repbodymass))); % age
564 % of beginning to reproduce when body weight reaches
565 % bodymass*repbodymass (slightly smaller than adult)
566
567
568
569 repenergy = birthmass*littersize/bodymass; % a coefficient of investment
570 % into reproduction
```

```
571                                     % used for balancing how much energy an
572                                     % individual can invest into
573                                     % different reproductive
574                                     % parameteres
575
576
577     exthaz = 0.0001; % koefficient affecting the chance of dying of external
578                     % hazards
579
580     a = 1;
581     b = 1; % exthaz, a and b are used in the Lotka-Volterra equation that
582           % regulates external hazard pressure
583
584     % INITIAL POPULATION
585     initpop(1, 1:popsiz) = 1:popsiz; %1.
586     initpop(2, 1:popsiz) = randi([1, riskage], 1, popsiz); %2.
587     initpop(3, 1:popsiz) = ones(1, popsiz).*bodymass; %3.
588     initpop(4, 1:popsiz) = growthcurve(1, initpop(2, :)); %4.
589     initpop(5, 1:popsiz) = birthmass; %5.
590     initpop(6, 1:popsiz) = mutrate; %6.
591     initpop(7, 1:popsiz) = rrate; %7.
592     initpop(8, 1:popsiz) = littersize; %8.
593     initpop(9, 1:popsiz) = somdeath; %9.
594     initpop(10, 1:popsiz) = reprodage; %10.
595     initpop(11, 1:popsiz) = somEnergy; %11.
596
597     %1. individual ID (used in mixed genotype experiments to identify genotype)
598     %2. current age
599     %3. inherited body mass
600     %4. current body mass
601     %5. inherited birth mass
602     %6. inherited mutation rate
603     %7. inherited reproduction rate
604     %8. inherited litter size
605     %9. parameter of somatic death probability function (somdeath) in the aging
606         % function
607     %10. age when beginning to reproduce
608     %11. energy invested in somatic maintenance (explained in METHODS)
609
610     if(newrun) % initial population is created at the beginning of simulation
611         population = initpop;
612     end
613
614     %THE CORE SIMULATION RUN
615     for timeunit = timeun : totaltime
616
617         disp(timeunit);
618
619         % STORAGE MATRICES KEEP TRACK OF POPULATION PARAMETERS THROUGHOUT
620     SIMULATION
621         biomassdyn(timeunit) = sum(population(4, :))/sum(initpop(4, :));
622         popsizeodyn(timeunit) = size(population, 2)/size(initpop, 2);
623         bodymassevol(timeunit) = mean(population(3, :));
624         birthmassevol(timeunit) = mean(population(5, :));
625         littersizeevol(timeunit) = mean(population(8, :));
626         mutrateevol(timeunit) = mean(population(6, :));
627         rrateevol(timeunit) = mean(population(7, :));
```

```
627     lifespanevol(timeunit) = 1/mean(population(9, :));
628
629
630
631
632     %===== REPRODUCTION =====
633
634     % potreprodpop (potentially reproducing population) collects mature
635 % subpopulation
636     potreprodpop = population(:, population(2, :)-population(10, :)>0);
637
638     % variance is introduced in time between reproductions
639     reprodvars = round(normrnd(rrate, rratevar));
640
641     % reprodpop (reproducing population) collects individuals that are
642     % past their period between reproduction and are due reproducing
643 % (+ some additional variance)
644     reprodpop = potreprodpop(:, rem(potreprodpop(2, :)-potreprodpop(10, :),
645 reprodvars) == 0);
646
647
648     % copies of their parent individual are created as their progeny -
649     % newgen
650     newgen = zeros(size(reprodpop, 1), 1);
651     for i = 1 : size(reprodpop, 2)
652         if(~isempty(reprodpop))
653             progeny = repmat(reprodpop(1:size(reprodpop, 1), i), 1,
654 round(normrnd(littersize, littervar)));
655             newgen = [newgen, progeny];
656         end
657     end
658     newgen = newgen(:, 2:end);
659
660     % number of new offspring is collected into a storage matrix
661     births(timeunit) = size(newgen, 2);
662
663     % inherited variance (proportional to parent's mutation rate)
664     % modifies parental parameters producing varying offspring
665     newgen(2, :) = 1;
666     newgen(3, :) = real(newgen(3, :) + (normrnd(0, newgen(6, :)*inhvar).*
667 newgen(3, :)));
668     newgen(4, :) = real(newgen(5, :) + (normrnd(0, newgen(6, :)*inhvar).*
669 newgen(5, :)));
670     newgen(5, :) = real(newgen(5, :) + (normrnd(0, newgen(6, :)*inhvar).*
671 newgen(5, :)));
672     newgen(5, newgen(5, :) > 0.5.*newgen(3, :)) = 0.5.*newgen(3, newgen(5, :) >
673 0.5.*newgen(3, :));
674     newgen(6, :) = real(newgen(6, :) + (normrnd(0, newgen(6, :)*inhvar).*
675 newgen(6, :)));
676     newgen(8, :) = real(newgen(8, :) + (normrnd(0, newgen(6, :)*inhvar).*
677 newgen(8, :)));
678     newgen(7, :) = real(newgen(5, :).*newgen(8, :)./newgen(3,
679 :)./repenergy.*rrate);
680     newgen(10, :) = 0;
```

```
681         newgen(11, :) = real(newgen(11, :) + (normrnd(0, newgen(6, :)*inhvar).*
682 newgen(11, :)));
683
684     % the somatic maintenance (somdeath) parameter of the aging
685     % function is calculated based on the somatic maintenance energy
686     % investment with inherited variance (see METHODS)
687     newgen(9, :) = real((0.00000072523237903965.*(log(newgen(11, :)).^6))...
688         -(0.0000458064654458169.*(log(newgen(11, :)).^5))...
689         +(0.00123267215690707.*(log(newgen(11, :)).^4))...
690         -(0.0183381238349637.*(log(newgen(11, :)).^3))...
691         +(0.162769338153511.*(log(newgen(11, :)).^2))...
692         -(0.863957066277595.*(log(newgen(11, :)).^1))...
693         + 2.46992883606531000000);
694
695     % new offspring is added to the population
696     population = [population, newgen];
697
698
699
700     %===== MORTALITY =====
701
702     %MORTALITY CAUSED BY SOMATIC/PHYSIOLOGICAL FACTORS
703
704     % individual probabilities of dying of somatic causes during this update
705     probsdeath = [];
706
707     % version 1 (standard) = death rates are affected by body mass
708     % (increased somatic risk)
709     % and the performance of the somtic maintenance program in
710     % mitigating somatic risk
711     probsdeath = population(6, :).*(population(4, :)/bodymass)...
712         .*exp(population(2, :).^population(9, :));
713
714
715     % version 2 = somatic cost unrelated
716     % (used when the "body mass" parameter is converted into
717     % a trait that is selected for but does not affect somatic risks)
718     %
719     %
720     probsdeath = population(6, :)...
721     .*exp(population(2, :).^population(9, :));
722
723     probsdeath(probsdeath > 1) = 0;
724     probsdeath(probsdeath < 0) = 0;
725
726     % individuals actually dying of somatic causes during this update
727     % based on binomial trials using probsdeath
728     death = [];
729     death = binornd(1, probsdeath(1, :));
730
731     % data on mortality of somatic causes is stored in a storage matrix
732     sommortality = [sommortality, population(2, death(1, :) == 1)];
733     %-----
734
735     % dead individuals are eliminated from the population
```



```
735     population(:, death(1, :) == 1) = 0;
736     population = population(:, population(1, :) > 0);
737
738
739
740     % MORTALITY CAUSED BY EXTERNAL HAZARDS (predation, disease, etc)
741     % (the Lotka-Voterra model of predator-prey dynamics was used as a basis)
742
743     % population size-dependent external hazard pressure (exthazard)
744     exthazard = exthaz...
745         +((a*popsizedyn(timeunit)*exthaz) - (b*exthaz));
746
747     % probabilities of dying of external hazards (development of bodymass
748     % or other selected trait reduces chances of dying
749     % of external hazards)
750     extprobs = [];
751     extprobs = exthazard.*(bodymass./population(4, :));
752     extprobs(1, extprobs > 1) = 1;
753     extprobs(1, extprobs < 0) = 0;
754
755     % individuals actually dying of causes related to external hazards
756     % based on binomial trials using extprobs
757     extdeath = [];
758     extdeath = binornd(1, extprobs(1, :));
759
760     % data on mortality caused by external hazards is stored in a storage
761     matrix     extmortality = [extmortality, population(2, extdeath(1, :) == 1)];
762
763     %-----
764
765     % dead individuals are eliminated from the population
766     population(:, extdeath(1, :) == 1) = 0;
767     population = population(:, population(1, :) > 0);
768
769
770
771     % MORTALITY IMPOSED BY ECOSYSTEM'S CARRYING CAPACITY
772     % (essentially reflects mortality caused by intra-specific competition)
773
774     % Version 1 = used when maximum biomass is kept stable
775     % (in experiments when body mass evolves)
776     % (development of body mass reduces the chances of dying
777     % in intra-specific competition)
778     overkill = sum(population(4, :))/ sum(initpop(4, :));
779     invs = 1./population(4, :);
780     capprobs = invs/sum(invs);
781     capprobs = capprobs - (mean(capprobs));
782     capprobs = capprobs + (1 - (1/overkill));
783
784     % Version 2 = used when population size is kept stable
785     % (in experiments when "body mass" is trasformed
786     % into another selected trait)
787     % (development of body mass or other selected trait
788     % reduces the chances of dying in intra-specific competition)
789     %
790     overkill = size(population, 2) / size(initpop, 2);
```

```
790 %         invs = 1./population(4, :);
791 %         capprobs = invs/sum(invs);
792 %         capprobs = capprobs - (mean(capprobs));
793 %         capprobs = capprobs + (1 - (1/overkill));
794
795         capprobs(capprobs < 0) = 0;
796         capprobs(capprobs > 1) = 1;
797
798         % individuals actually dying in intra-specific competition
799         % based on binomial trials using extprobs
800         capdeath = [];
801         capdeath = binornd(1, capprobs(1, :));
802
803
804
805         % data on mortality caused by intra-specific competition
806         % is stored in a storage matrix
807         capmortality = [capmortality, population(2, capdeath(1, :) == 1)];
808
809         % dead individuals are eliminated from the population
810         population(:, capdeath(1, :) == 1) = 0;
811         population = population(:, population(1, :) > 0);
812
813
814
815
816         % =====UPDATING AGE AND BODY MASS DUE TO GROWTH=====
817         population(2, :) = population(2, :) + 1;
818         population(4, :) = population(4, :) + 0.3*growthrate*(1 - (population(4,
819 :)./population(3, :)));
820
821
822
823         % =====ASSIGNING MATURITY AGES FOR THE NEW OFFSPRING=====
824         newborns = find(population(10, :) == 0);
825         grownnewborns = find(population(4, :)./population(3, :) >= repbodymass);
826         mature = intersect(newborns, grownnewborns);
827         population(10, mature) = population(2, mature);
828
829
830
831         % =====SAVING VARIABLES INTO FILES=====
832         if(fname > size(filenamees, 2))
833             fname = 1;
834             iter = iter+1;
835         end
836         if(rem(timeunit, 15000) == 0)
837             its(1:iter) = 'z';
838             save(['D:\' its filenamees(fname) '.mat']);
839         end
840         if(rem(timeunit, 30000) == 0)
841             fname = fname + 1;
842         end
843
```

```
844
845     % =====REMOVAL OF OCCASIONAL NaNs=====
846     population(:, isnan(sum(population(:, :)))) = 0;
847     population = population(:, population(1, :) > 0);
848
849     end
850
851
852     % =====ENTIRE SIMULATION RUN IS SAVED IN A FILE=====
853     these(1:iteration) = '0';
854     save(['D:\' these 'zzh.mat']);
855     end
856
857     % =====TOTAL SIMULATION TIME MEASURES=====
858     time = toc;
859     hours = floor(time / 3600);
860     time = time - hours * 3600;
861     mins = floor(time / 60);
862     secs = time - mins * 60;
863     secs = round(secs);
864
865     fprintf('Execution time (HH:MM:SS) - %d:%d:%d      \n\n', hours, mins, secs);
866
```

## 867 **b. *Competitive model for competition between two genotypes.***

```
868
869     for iteration = 1 : 25
870         disp(iteration);
871
872         newrun = true;
873
874         if(newrun)
875             clearvars -except newrun iteration
876             fname = 1;
877             timeun = 1;
878             iter = 1;
879
880             % OUTPUT STORAGE
881             sommortality = []; % counts of mortality for somatic reasons
882             extmortality = []; % counts of mortality caused by external hazard
883             capmortality = []; % counts of mortality imposed by ecosystem's
884                             % carrying capacity (intra-specific competition)
885             biomassdyn = []; % population biomass dynamics over time
886             popsizedyn = []; % population size dynamics over time
887             births = []; % counts of new births over time
888
889             fragspec1 = []; % fraction of genotype 1
890
891             % individual parameters for genotype 1
892             bodymassevol1 = []; % population's average bodymass over time
893             birthmassevol1 = []; % population's average birthmass over time
894             littersizevol1 = []; % population's average litter size over time
895             mutrateevol1 = []; % population's average mutation rate over time
896             rrateevol1 = []; % population's average reproduction rate over time
897             lifespanevol1 = []; % population's average somatic maintenance
```

```
898             % coefficient over time
899
900     % individual parameters for genotype 2
901     bodymassevol2 = []; % population's average bodymass over time
902     birthmassevol2 = []; % population's average birthmass over time
903     littersizeevol2 = []; % population's average litter size over time
904     mutrateevol2 = []; % population's average mutation rate over time
905     rrateevol2 = []; % population's average reproduction rate over time
906     lifespancevol2 = []; % population's average somatic maintenance
907             % coefficient over time
908 else
909     timeun = timeunit + 1;
910     if(fname == size(filenamees, 2))
911         fname = 1;
912     else
913         fname = fname + 1;
914     end
915 end
916 filenamees = ['a' 'b' 'c' 'd' 'e' 'f' 'g' 'h' 'i' 'j' 'k' 'l' 'm' 'n'...
917             'o' 'p' 'q' 'r' 's' 't' 'u' 'v' 'w' 'x' 'y' 'z'];
918
919 % GENERAL MODEL PARAMETERS:
920 totaltime = 1005000; % total # of simulation updates ("time")
921 popsize = 10000; % initial population size
922 mutrate = 0.000000001;
923 inhvar = 25000000; % a multiplier of mutation rate determining
924             % variance in trait inheritance (var=inhvar*mutrate)
925             % so that inheritance variance is proportional to
926             % mutation rate
927 bodymass = 5000; % initial adult bodymass
928 birthmass = 300; % initial body mass at birth
929
930 repbodymass = 0.9693; % multiplier determining at what body mass
931             % as a fraction of the individual's inherited
932             % adult body mass the individual begins to
933             % reproduce
934 rrate = 600; % initial time (in # simulation updates)
935             % between successive reproductions
936 littersize = 1; % initial # progeny per reproduction per individual
937 littervar = (0.1*littersize)/littersize; % variance of littersize
938 rratevar = (0.1*rrate)/rrate; % variance of reproduction rate
939 growthrate = 57; % coefficient of body growth rate
940
941 somdeath = 0.34; % an exponential coefficient of the somatic maintenance
942 equation
943 somEnergy = 2231.81365913237; % initial energy invested in somatic
944     % maintenance when somdeath=0.34
945             % see SUPPLEMENTS
946
947 aging = mutrate*exp([1:1000000].^somdeath); % the aging function -
948             % probability of dying for somatic reasons over time
949
950 risk = cumsum(aging); % cumulative sum function of the aging curve
951 [c riskage] = min(abs(risk-1)); % riskage - age at which risk = 1;
952             % explained in METHODS
953
```

```
954     %INITIAL BODY GROWTH FUNCTION
955     growthcurve = [birthmass]; % curve for body size distribution in the initial
956     population
957                                     % initial population is generated with ages
958                                     % ranging from 1 to riskage, they are
959                                     % assigned their current body mass according
960                                     % to growthfunction
961     for i = 2 : riskage
962         growthcurve(i) = growthcurve(i-1) + 0.3*growthrate*(1 - (growthcurve(i-
963 1)/bodymass));
964     end
965
966     [c reprodage] = min(abs(growthcurve - (bodymass*reprobodymass))); % age
967                                     % of beginning to reproduce when body weight reaches
968                                     % bodymass*reprobodymass (slightly smaller than adult)
969
970
971
972     repenergy = birthmass*littersize/bodymass; % a coefficient of investment
973                                     % into reproduction
974                                     % used for balancing how much energy an
975                                     % individual can invest into
976                                     % different reproductive
977                                     % parameters
978
979
980     exthaz = 0.0001; % coefficient affecting the chance of dying of external
981                                     % hazards
982
983     a = 1;
984     b = 1; % exthaz, a and b are used in the Lotka-Volterra equation that
985                                     % regulates external hazard pressure
986
987     %initial population
988     initpop(1, 1:ceil(popsiz/2)) = 1; %1 genotype 1
989     initpop(1, ceil(popsiz/2)+1:popsiz) = 2; %1 genotype 2
990     initpop(2, 1:popsiz) = randi([1, maxage], 1, popsiz); %2
991     initpop(3, 1:popsiz) = ones(1, popsiz).*bodymass; %3
992     initpop(4, 1:popsiz) = growthcurve(1, initpop(2, :)); %4
993     initpop(5, 1:popsiz) = birthmass; %5
994     initpop(6, 1:ceil(popsiz/2)) = mutrate/10; %6 genotype 1
995     initpop(6, ceil(popsiz/2)+1:popsiz) = mutrate; %6 genotype 2
996     initpop(7, 1:popsiz) = rrate; %7
997     initpop(8, 1:popsiz) = littersize; %8
998     initpop(9, 1:popsiz) = somdeath; %9
999     initpop(10, 1:popsiz) = reprodage; %10
1000     initpop(11, 1:popsiz) = somEnergy; %11
1001
1002     %1. individual ID (used in mixed genotype experiments to identify genotype)
1003     %2. current age
1004     %3. inherited body mass
1005     %4. current body mass
1006     %5. inherited birth mass
1007     %6. inherited mutation rate
1008     %7. inherited reproduction rate
1009     %8. inherited litter size
1010     %9. parameter of somatic death probability function (somdeath) in the aging
```

```
1010     % function
1011     %10. age when beginning to reproduce
1012     %11. energy invested in somatic maintenance (explained in METHODS)
1013
1014
1015
1016     if(newrun) % initial population is created at the beginning of simulation
1017         population = initpop;
1018     end
1019
1020
1021     %THE CORE SIMULATION RUN
1022     for timeunit = timeun : totaltime
1023         disp(timeunit);
1024
1025         % STORAGE MATRICES KEEP TRACK OF POPULATION PARAMETERS THROUGHOUT
1026     SIMULATION
1027         biomassdyn(timeunit) = sum(population(4, :))/sum(initpop(4, :));
1028         popsizedyn(timeunit) = size(population, 2)/size(initpop,2);
1029
1030         bodymassevol1(timeunit) = mean(population(3, population(1,')==1));
1031         birthmassevol1(timeunit) = mean(population(5, population(1,')==1));
1032         littersizeevol1(timeunit) = mean(population(8, population(1,')==1));
1033         mutrateevol1(timeunit) = mean(population(6, population(1,')==1));
1034         rrateevol1(timeunit) = mean(population(7, population(1,')==1));
1035         lifespanevol1(timeunit) = 1/mean(population(9, population(1,')==1));
1036
1037         bodymassevol2(timeunit) = mean(population(3, population(1,')==2));
1038         birthmassevol2(timeunit) = mean(population(5, population(1,')==2));
1039         littersizeevol2(timeunit) = mean(population(8, population(1,')==2));
1040         mutrateevol2(timeunit) = mean(population(6, population(1,')==2));
1041         rrateevol2(timeunit) = mean(population(7, population(1,')==2));
1042         lifespanevol2(timeunit) = 1/mean(population(9, population(1,')==2));
1043
1044         fracpec1(timeunit) = numel(population(1, population(1,:) ==
1045 1))/size(population, 2)*100;
1046
1047         %===== REPRODUCTION =====
1048
1049         % potreprodpop (potentially reproducing population) collects mature
1050         % subpopulation
1051         potreprodpop = population(:, population(2, :)-population(10, :)>0);
1052
1053         % variance is introduced in time between reproductions
1054         reprodvars = round(normrnd(rrate, rratevar));
1055
1056         % reprodpop (reproducing population) collects individuals that are
1057         % past their period between reproduction and are due reproducing
1058         % (+ some additional variance)
1059         reprodpop = potreprodpop(:, rem(potreprodpop(2, :)-potreprodpop(10, :),
1060 reprodvars) == 0);
1061
1062
1063         % copies of their parent individual are created as their progeny -
```

```
1064     % newgen
1065     newgen = zeros(size(reprodpop, 1), 1);
1066     for i = 1 : size(reprodpop, 2)
1067         if(~isempty(reprodpop))
1068             progeny = repmat(reprodpop(1:size(reprodpop, 1), i), 1,
1069 round(normrnd(littersize, littervar)));
1070             newgen = [newgen, progeny];
1071         end
1072     end
1073     newgen = newgen(:, 2:end);
1074
1075     % number of new offspring is collected into a storage matrix
1076     births(timeunit) = size(newgen, 2);
1077
1078     % inherited variance (proportional to parent's mutation rate)
1079     % modifies parental parameters producing varying offspring
1080     newgen(2, :) = 1;
1081     newgen(3, :) = real(newgen(3, :) + (normrnd(0, newgen(6, :)*inhvar).*
1082 newgen(3, :)));
1083     newgen(4, :) = real(newgen(5, :) + (normrnd(0, newgen(6, :)*inhvar).*
1084 newgen(5, :)));
1085     newgen(5, :) = real(newgen(5, :) + (normrnd(0, newgen(6, :)*inhvar).*
1086 newgen(5, :)));
1087     newgen(5, newgen(5, :) > 0.5.*newgen(3, :)) = 0.5.*newgen(3, newgen(5, :) >
1088 0.5.*newgen(3, :));
1089     % mutation rates are fixed and differ between two genotypes
1090     % newgen(6, newgen(1, :) == 1) = real(newgen(6, newgen(1, :) == 1) +
1091 (normrnd(0, newgen(6, newgen(1, :) == 1)*inhvar).* newgen(6, newgen(1, :) == 1)));
1092     newgen(8, :) = real(newgen(8, :) + (normrnd(0, newgen(6, :)*inhvar).*
1093 newgen(8, :)));
1094     newgen(7, :) = real(newgen(5, :).*newgen(8, :)./newgen(3,
1095 :)./repenergy.*rrate);
1096     newgen(10, :) = 0;
1097     newgen(11, :) = real(newgen(11, :) + (normrnd(0, newgen(6, :)*inhvar).*
1098 newgen(11, :)));
1099
1100     % the somatic maintenance (somdeath) parameter of the aging
1101     % function is calculated based on the somatic maintenance energy
1102     % investment with inherited variance (see METHODS)
1103     newgen(9, :) = real((0.00000072523237903965.*(log(newgen(11, :)).^6))...
1104 - (0.0000458064654458169.*(log(newgen(11, :)).^5))...
1105 + (0.00123267215690707.*(log(newgen(11, :)).^4))...
1106 - (0.0183381238349637.*(log(newgen(11, :)).^3))...
1107 + (0.162769338153511.*(log(newgen(11, :)).^2))...
1108 - (0.863957066277595.*(log(newgen(11, :)).^1))...
1109 + 2.46992883606531000000);
1110
1111     % new offspring is added to the population
1112     population = [population, newgen];
1113
1114
1115
1116     %===== MORTALITY =====
1117
1118     %MORTALITY CAUSED BY SOMATIC/PHYSIOLOGICAL FACTORS
```

```
1119
1120     % individual probabilities of dying of somatic causes during this update
1121     probsdeath = [];
1122
1123     % version 1 (standard) = death rates are affected by body mass
1124     % (increased somatic risk)
1125     % and the performance of the somtic maintenance program in
1126     % mitigating somatic risk
1127     probsdeath = population(6, :).*(population(4, :)/bodymass)...
1128     .*exp(population(2, :).^population(9, :));
1129
1130
1131     % version 2 = somatic cost unrelated
1132     % (used when the "body mass" parameter is converted into
1133     % a trait that is selected for but does not affect somatic risks)
1134     %
1135     %
1136     probsdeath = population(6, :)...
1137     .*exp(population(2, :).^population(9, :));
1138
1139     probsdeath(probsdeath > 1) = 0;
1140     probsdeath(probsdeath < 0) = 0;
1141
1142     % individuals actually dying of somatic causes during this update
1143     % based on binomial trials using probsdeath
1144     death = [];
1145     death = binornd(1, probsdeath(1, :));
1146
1147
1148     % data on mortality of somatic causes is stored in a storage matrix
1149     sommortality = [sommortality, population(2, death(1, :) == 1)];
1150     %-----
1151
1152     % dead individuals are eliminated from the population
1153     population(:, death(1, :) == 1) = 0;
1154     population = population(:, population(1, :) > 0);
1155
1156
1157     % MORTALITY CAUSED BY EXTERNAL HAZARDS (predation, disease, etc)
1158     % (the Lotka-Voterra model of predator-prey dynamics was used as a basis)
1159
1160     % population size-dependent external hazard pressure (exthazard)
1161     exthazard = exthaz...
1162     +((a*popsizedyn(timeunit)*exthaz) - (b*exthaz));
1163
1164     % probabilities of dying of external hazards (development of bodymass
1165     % or other selected trait reduces chances of dying
1166     % of external hazards)
1167     extprobs = [];
1168     extprobs = exthazard.*(bodymass./population(4, :));
1169     extprobs(1, extprobs > 1) = 1;
1170     extprobs(1, extprobs < 0) = 0;
1171
1172     % individuals actually dying of causes related to external hazards
1173     % based on binomial trials using extprobs
```



```
1173     extdeath = [];  
1174     extdeath = binornd(1, extprobs(1, :));  
1175  
1176     % data on mortality caused by external hazards is stored in a storage  
1177 matrix  
1178     extmortality = [extmortality, population(2, extdeath(1, :) == 1)];  
1179     %-----  
1180  
1181     % dead individuals are eliminated from the population  
1182     population(:, extdeath(1, :) == 1) = 0;  
1183     population = population(:, population(1, :) > 0);  
1184  
1185  
1186  
1187     % MORTALITY IMPOSED BY ECOSYSTEM'S CARRYING CAPACITY  
1188     % (essentially reflects mortality caused by intra-specific competition)  
1189  
1190     % Version 1 = used when maximum biomass is kept stable  
1191     % (in experiments when body mass evolves)  
1192     % (development of body mass reduces the chances of dying  
1193     % in intra-specific competition)  
1194     overkill = sum(population(4, :)) / sum(initpop(4, :));  
1195     invs = 1./population(4, :);  
1196     capprobs = invs/sum(invs);  
1197     capprobs = capprobs - (mean(capprobs));  
1198     capprobs = capprobs + (1 - (1/overkill));  
1199  
1200     % Version 2 = used when population size is kept stable  
1201     % (in experiments when "body mass" is trasformed  
1202     % into another selected trait)  
1203     % (development of body mass or other selected trait  
1204     % reduces the chances of dying in intra-specific competition)  
1205     % overkill = size(population, 2) / size(initpop, 2);  
1206     % invs = 1./population(4, :);  
1207     % capprobs = invs/sum(invs);  
1208     % capprobs = capprobs - (mean(capprobs));  
1209     % capprobs = capprobs + (1 - (1/overkill));  
1210  
1211     capprobs(capprobs < 0) = 0;  
1212     capprobs(capprobs > 1) = 1;  
1213  
1214     % individuals actually dying in intra-specific competition  
1215     % based on binomial trials using extprobs  
1216     capdeath = [];  
1217     capdeath = binornd(1, capprobs(1, :));  
1218  
1219  
1220  
1221     % data on mortality caused by intra-specific competition  
1222     % is stored in a storage matrix  
1223     capmortality = [capmortality, population(2, capdeath(1, :) == 1)];  
1224  
1225     % dead individuals are eliminated from the population  
1226     population(:, capdeath(1, :) == 1) = 0;  
1227     population = population(:, population(1, :) > 0);
```

```
1228
1229
1230
1231
1232     % =====UPDATING AGE AND BODY MASS DUE TO GROWTH=====
1233     population(2, :) = population(2, :) + 1;
1234     population(4, :) = population(4, :) + 0.3*growthrate*(1 - (population(4,
1235 :)./population(3, :)));
1236
1237
1238
1239     % =====ASSIGNING MATURITY AGES FOR THE NEW OFFSPRING=====
1240     newborns = find(population(10, :) == 0);
1241     grownnewborns = find(population(4, :)./population(3, :) >= repbodymass);
1242     mature = intersect(newborns, grownnewborns);
1243     population(10, mature) = population(2, mature);
1244
1245
1246
1247     % =====SAVING VARIABLES INTO FILES=====
1248     if(fname > size(filenamees, 2))
1249         fname = 1;
1250         iter = iter+1;
1251     end
1252     if(rem(timeunit, 15000) == 0)
1253         its(1:iter) = 'z';
1254         save(['D:\' its filenamees(fname) '.mat']);
1255     end
1256     if(rem(timeunit, 30000) == 0)
1257         fname = fname + 1;
1258     end
1259
1260
1261     % =====REMOVAL OF OCCASIONAL NaNs=====
1262     population(:, isnan(sum(population(:, :)))) = 0;
1263     population = population(:, population(1, :) > 0);
1264
1265     end
1266
1267
1268     % =====ENTIRE SIMULATION RUN IS SAVED IN A FILE=====
1269     these(1:iteration) = '0';
1270     save(['D:\' these 'zsh.mat']);
1271     end
1272
1273     % =====TOTAL SIMULATION TIME MEASURES=====
1274     time = toc;
1275     hours = floor(time / 3600);
1276     time = time - hours * 3600;
1277     mins = floor(time / 60);
1278     secs = time - mins * 60;
1279     secs = round(secs);
1280
1281     fprintf('Execution time (HH:MM:SS) - %d:%d:%d \n\n', hours, mins, secs);
```

1282

1283

1284

1285 **Section 2. Evolution of reproductive traits under fixed adult body mass.** As shown in **Fig. S1**,  
1286 the early simulation period is linked with rapid evolution of reproduction rate and body mass at  
1287 birth, which is likely to have caused positive selection for gMR shown in **Fig. 2B**. Litter size,  
1288 however, in our simulations did not show any consistent evolution under this condition.  
1289

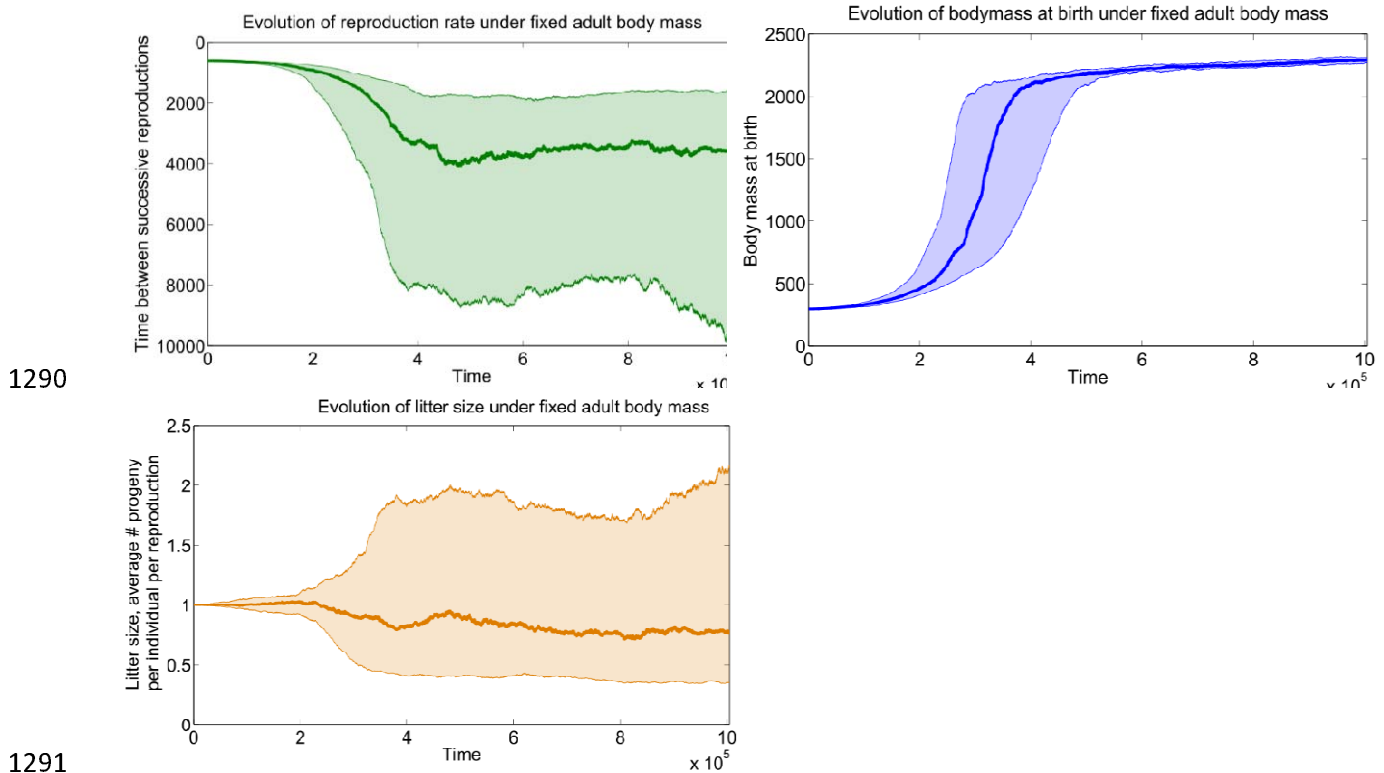

**Fig. S1. Evolution of reproductive parameters in simulations with fixed adult body mass.**

1293

1294 **Section 3. All-cause age-dependent mortality in the model.** The model recapitulates a typical  
1295 age-dependent mortality chart for wild animals (**Fig. S2**). Early life is accompanied with the  
1296 very high mortality rates which drop until maturity. **Fig. S3** demonstrates natural log data.  
1297

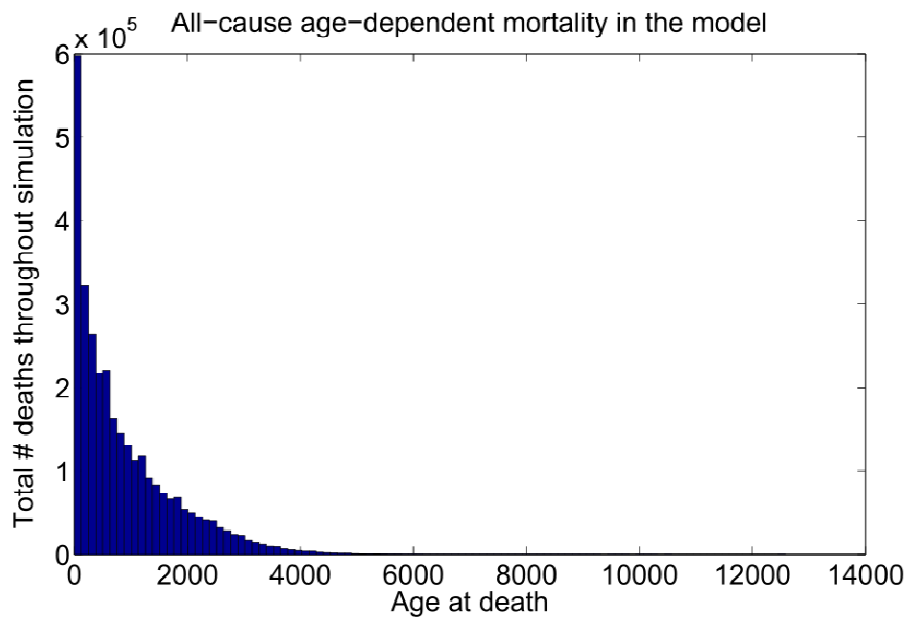

1298

1299 **Fig. S2. Total mortality by age in absolute numbers.**

1300

1301

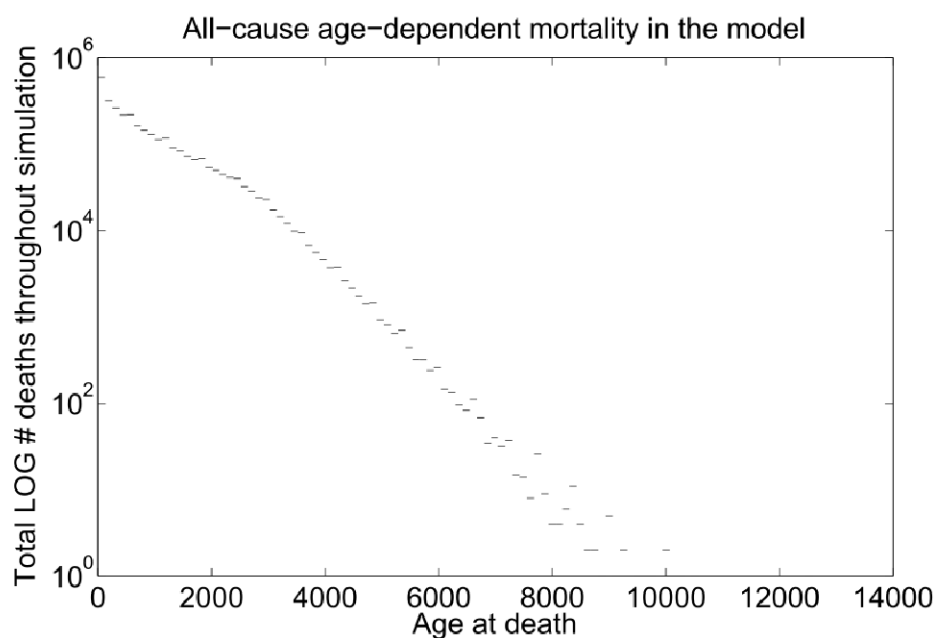

1302

1303

**Fig. S3. Total mortality by age in log-absolute numbers.**

1304

1305

1306       **Section 4. The aging curve calculations.** In order to model inherited variation of SMP  
1307 strength, we needed a method of linearly varying SMP (e.g. +1%, -5% etc). Since the *Som*  
1308 parameter in **Eq. 1** is in a complex non-linear relationship with the resulting aging curve, this  
1309 parameter is not suitable for such manipulation. We therefore reasoned that the best  
1310 representation of the efficiency of SMP is using the area under the physiological mortality  
1311 curve as a measure of the general efficiency of SMP over lifetime. **Eq. 1** generates the  
1312 probability  $D_A$  of dying of physiological causes at age A. Its cumulative probability function  
1313 generates probability  $D(A)$  of dying by age A.  $D(A)$  thus is directly related with longevity (like  
1314 the human mortality curve). However, the  $D(A)$  function decelerates as the cumulative  
1315 probability of dying approaches 1 (it can be seen in the human mortality curve in **Fig. 1B** and is  
1316 a general property of cumulative probability functions). In order to avoid these effects, we did  
1317 not use the area under the  $D(A)$  function as a measure of SMP strength, but instead we  
1318 applied the area under the cumulative sum function of the  $D_A$  probability, as shown in the  
1319 figure below, starting from the simulated age 1 and until the age at which this function reaches  
1320 1. In **Fig. S4**, the green curve represents extended longevity compared to the blue curve, since  
1321 the sum of its probabilities of dying accumulates more slowly (slower aging). As a result, the  
1322 area under the green curve is larger, corresponding to a stronger SMP program. In order to  
1323 model inherited variation in SMP, we used this area as a representation of the SMP strength.  
1324 The area was stochastically varied from generation to generation as explained in **Methods**, and  
1325 its new value in progeny was used to calculate the *Som* parameter for **Eq. 1** (determines the  
1326 probability of dying at age A). The calculation was based on the observation that the area  
1327 shown in **Fig. S4** demonstrates a strong non-linear log-log relationship with the *Som* parameter  
1328 (polynomial regression of the 6<sup>th</sup> order;  $R^2 > 0.99999$ ) as shown in **Fig. S5**.

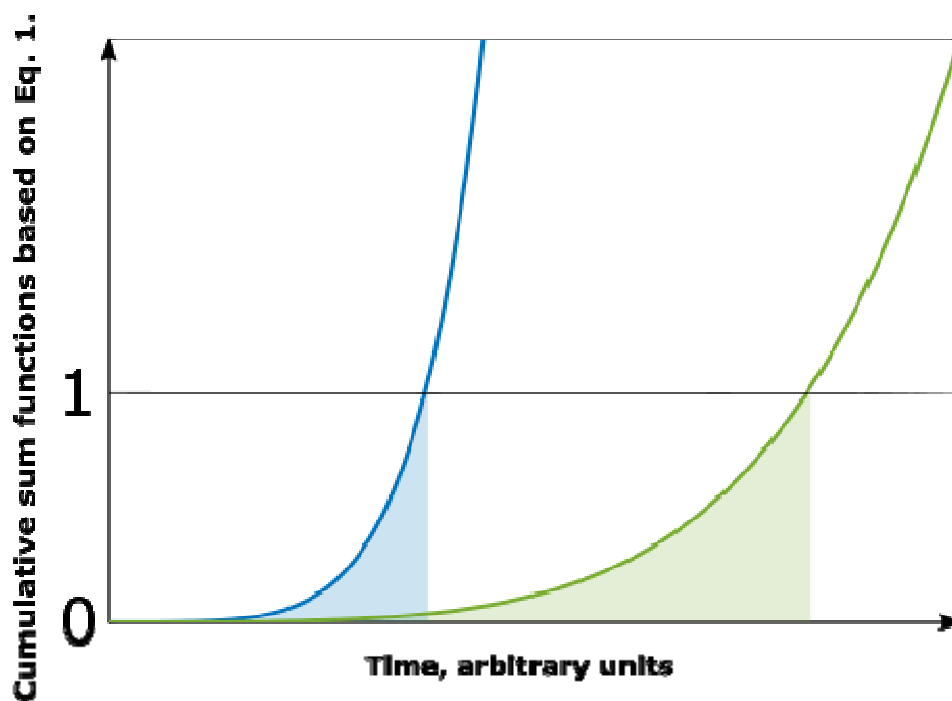

1329

1330 Fig. S4. Area under cumulative sum function of Eq. 1 as a measure of the relative  
1331 efficiency of SMP.

1332



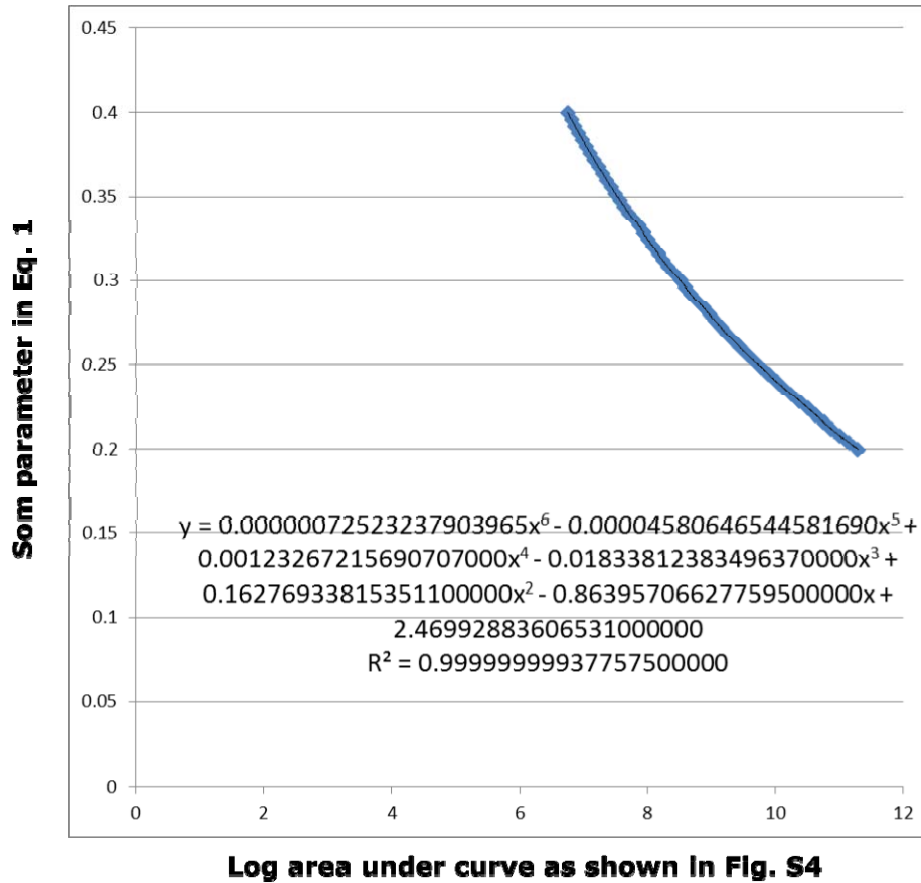

1333 **Log area under curve as shown in Fig. S4**

1334 Fig. S5. Relationship between log-area in Fig. S4 (log-efficiency of SMP) and the *Som*

1335 parameter in Eq. 1 (probability of dying at age A).

1336

1337

1338

1339

1340

1341

1342

1343 **Section 5. Removal of outliers.** Occasionally the model demonstrated unnatural “spikes” in the  
1344 evolution of some traits under some conditions. We had to apply the following code to remove  
1345 them:

```
1346 input = aaccbmbllsev_lit(22,:); % a certain problematic model run
1347
1348 threshold = 0.15; % arbitrary value
1349
1350 for row = 1 : size(input, 1)
1351     for col = 2 : size(input, 2)
1352         if input(row, col-1)/input(row, col) > 1+threshold || ...
1353             input(row, col-1)/input(row, col) < 1-threshold
1354             input(row, col) = input(row, col-1);
1355         end
1356     end
1357 end
1358
```

1359 The illustration below demonstrates an example (from a standard condition run) of the result:

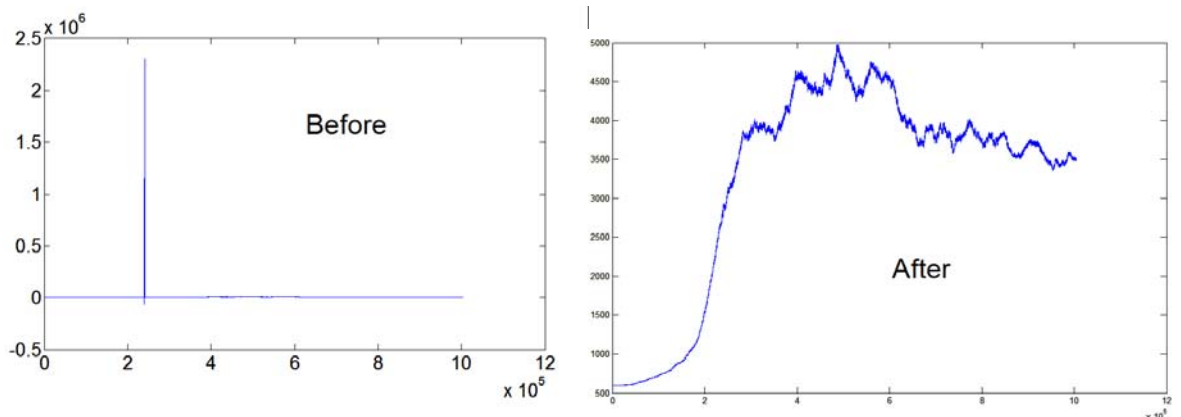

1360  
1361  
1362 The parameter “threshold” required manual alteration until the spike was cleaned by the code  
1363 above. Such spikes were visibly outstanding from the normal trend, so that the trend in the  
1364 evolving trait continued after the spike with values similar to those immediately preceding the  
1365 spike, indicating that the spikes were some artifacts that neither related to nor influenced the  
1366 modeled trait evolution. We were not able to determine the source of such spikes

1367

1368

1369

1370

1371

1372

## 1373 References

- 1374 1. N. A. Heim, M. L. Knope, E. K. Schaal, S. C. Wang, J. L. Payne, Animal evolution. Cope's rule in the  
1375 evolution of marine animals. *Science* **347**, 867-870 (2015).
- 1376 2. J. Baker, A. Meade, M. Pagel, C. Venditti, Adaptive evolution toward larger size in mammals. *Proc Natl*  
1377 *Acad Sci U S A* **112**, 5093-5098 (2015).
- 1378 3. M. Kimura, On the evolutionary adjustment of spontaneous mutation rates. *Genetical Research* **9**, 23-34  
1379 (1967).
- 1380 4. C. F. Baer, M. M. Miyamoto, D. R. Denver, Mutation rate variation in multicellular eukaryotes: causes  
1381 and consequences. *Nat Rev Genet* **8**, 619-631 (2007).
- 1382 5. K. J. Dawson, The dynamics of infinitesimally rare alleles, applied to the evolution of mutation rates and  
1383 the expression of deleterious mutations. *Theor Popul Biol* **55**, 1-22 (1999).
- 1384 6. M. Lynch, Evolution of the mutation rate. *Trends Genet* **26**, 345-352 (2010).
- 1385 7. M. Lynch, The lower bound to the evolution of mutation rates. *Genome Biol Evol* **3**, 1107-1118 (2011).
- 1386 8. M. Lynch *et al.*, Genetic drift, selection and the evolution of the mutation rate. *Nat Rev Genet* **17**, 704-  
1387 714 (2016).
- 1388 9. J. Pothof *et al.*, Identification of genes that protect the *C. elegans* genome against mutations by genome-  
1389 wide RNAi. *Genes Dev* **17**, 443-448 (2003).
- 1390 10. E. Marcon, P. B. Moens, The evolution of meiosis: recruitment and modification of somatic DNA-repair  
1391 proteins. *Bioessays* **27**, 795-808 (2005).
- 1392 11. D. Galetzka *et al.*, Expression of somatic DNA repair genes in human testes. *J Cell Biochem* **100**, 1232-  
1393 1239 (2007).
- 1394 12. D. Hanahan, R. A. Weinberg, The hallmarks of cancer. *Cell* **100**, 57-70 (2000).
- 1395 13. A. F. Caulin, C. C. Maley, Peto's Paradox: evolution's prescription for cancer prevention. *Trends Ecol Evol*  
1396 **26**, 175-182 (2011).
- 1397 14. C. Lopez-Otin, M. A. Blasco, L. Partridge, M. Serrano, G. Kroemer, The hallmarks of aging. *Cell* **153**, 1194-  
1398 1217 (2013).
- 1399 15. S. J. Pfau, R. E. Silberman, K. A. Knouse, A. Amon, Aneuploidy impairs hematopoietic stem cell fitness  
1400 and is selected against in regenerating tissues in vivo. *Genes Dev* **30**, 1395-1408 (2016).
- 1401 16. C. J. Sherr, Principles of tumor suppression. *Cell* **116**, 235-246 (2004).
- 1402 17. D. Glick, S. Barth, K. F. Macleod, Autophagy: cellular and molecular mechanisms. *J Pathol* **221**, 3-12  
1403 (2010).
- 1404 18. A. I. Rozhok, J. DeGregori, The evolution of lifespan and age-dependent cancer risk. *Trends Cancer* **2**,  
1405 552-560 (2016).
- 1406 19. J. B. Swann, M. J. Smyth, Immune surveillance of tumors. *J Clin Invest* **117**, 1137-1146 (2007).
- 1407 20. E. C. Cox, T. C. Gibson, Selection for high mutation rates in chemostats. *Genetics* **77**, 169-184 (1974).
- 1408 21. T. C. Gibson, M. L. Scheppe, E. C. Cox, Fitness of an *Escherichia coli* mutator gene. *Science* **169**, 686-688  
1409 (1970).
- 1410 22. P. D. Sniegowski, P. J. Gerrish, R. E. Lenski, Evolution of high mutation rates in experimental populations  
1411 of *E. coli*. *Nature* **387**, 703-705 (1997).
- 1412 23. K. Harris, Evidence for recent, population-specific evolution of the human mutation rate. *Proc Natl Acad*  
1413 *Sci U S A* **112**, 3439-3444 (2015).
- 1414 24. D. F. Conrad *et al.*, Variation in genome-wide mutation rates within and between human families. *Nat*  
1415 *Genet* **43**, 712-714 (2011).
- 1416 25. K. Harris, J. K. Pritchard, Rapid evolution of the human mutation spectrum. *Elife* **6**, (2017).
- 1417 26. J. Draghi, G. P. Wagner, Evolution of evolvability in a developmental model. *Evolution* **62**, 301-315  
1418 (2008).
- 1419 27. M. J. Benton, P. N. Pearson, Speciation in the fossil record. *Trends Ecol Evol* **16**, 405-411 (2001).

- 1420 28. N. Eldredge, S. J. Gould, in *Models in Paleobiology*, T. J. M. Schopf, Ed. (Freeman Cooper, San Francisco,  
1421 1972), pp. 82-115.
- 1422 29. S. J. Gould, N. Eldredge, Punctuated equilibrium comes of age. *Nature* **366**, 223-227 (1993).
- 1423 30. C. Venditti, A. Meade, M. Pagel, Multiple routes to mammalian diversity. *Nature* **479**, 393-396 (2011).
- 1424 31. E. Loh, J. J. Salk, L. A. Loeb, Optimization of DNA polymerase mutation rates during bacterial evolution.  
1425 *Proc Natl Acad Sci U S A* **107**, 1154-1159 (2010).
- 1426 32. A. G. Jones, R. Burger, S. J. Arnold, Epistasis and natural selection shape the mutational architecture of  
1427 complex traits. *Nat Commun* **5**, 3709 (2014).
- 1428 33. A. G. Jones, S. J. Arnold, R. Burger, The mutation matrix and the evolution of evolvability. *Evolution* **61**,  
1429 727-745 (2007).
- 1430 34. A. J. Lotka, *Elements of Physical Biology*. (Williams and Wilkins, Baltimore, 1925).
- 1431 35. V. Volterra, Variazioni e fluttuazioni del numero d'individui in specie animali conviventi. *Mem Acad*  
1432 *Lincei Roma* **2**, 31-113 (1926).
- 1433 36. M. E. Hochberg, R. J. Noble, A framework for how environment contributes to cancer risk. *Ecol Lett* **20**,  
1434 117-134 (2017).
- 1435 37. T. Madsen *et al.*, Cancer Prevalence and Etiology in Wild and Captive Animals. *Ecology and Evolution of*  
1436 *Cancer*, 11 (2017).
- 1437 38. A. I. Rozhok, J. DeGregori, Toward an evolutionary model of cancer: Considering the mechanisms that  
1438 govern the fate of somatic mutations. *Proc Natl Acad Sci U S A* **112**, 8914-8921 (2015).
- 1439 39. S. R. Kennedy, L. A. Loeb, A. J. Herr, Somatic mutations in aging, cancer and neurodegeneration. *Mech*  
1440 *Ageing Dev* **133**, 118-126 (2012).
- 1441 40. B. A. Finette *et al.*, Determination of hprt mutant frequencies in T-lymphocytes from a healthy pediatric  
1442 population: statistical comparison between newborn, children and adult mutant frequencies, cloning  
1443 efficiency and age. *Mutat Res* **308**, 223-231 (1994).
- 1444 41. H. Giese *et al.*, Age-related mutation accumulation at a lacZ reporter locus in normal and tumor tissues  
1445 of Trp53-deficient mice. *Mutat Res* **514**, 153-163 (2002).
- 1446 42. S. Horvath, DNA methylation age of human tissues and cell types. *Genome Biol* **14**, R115 (2013).

1447

## 1448 **Acknowledgments**

1449 We would like to thank Mark Johnston, L. Alex Liggett and David Pollock of the University  
1450 of Colorado, and Robert Gatenby and Andriy Marusyk of the Moffitt Cancer Center for critical  
1451 review of the manuscript. These studies were supported by National Cancer Institute grant  
1452 R01CA180175 to J.D.

1453

1454

1455

1456 **Figures and Legends**

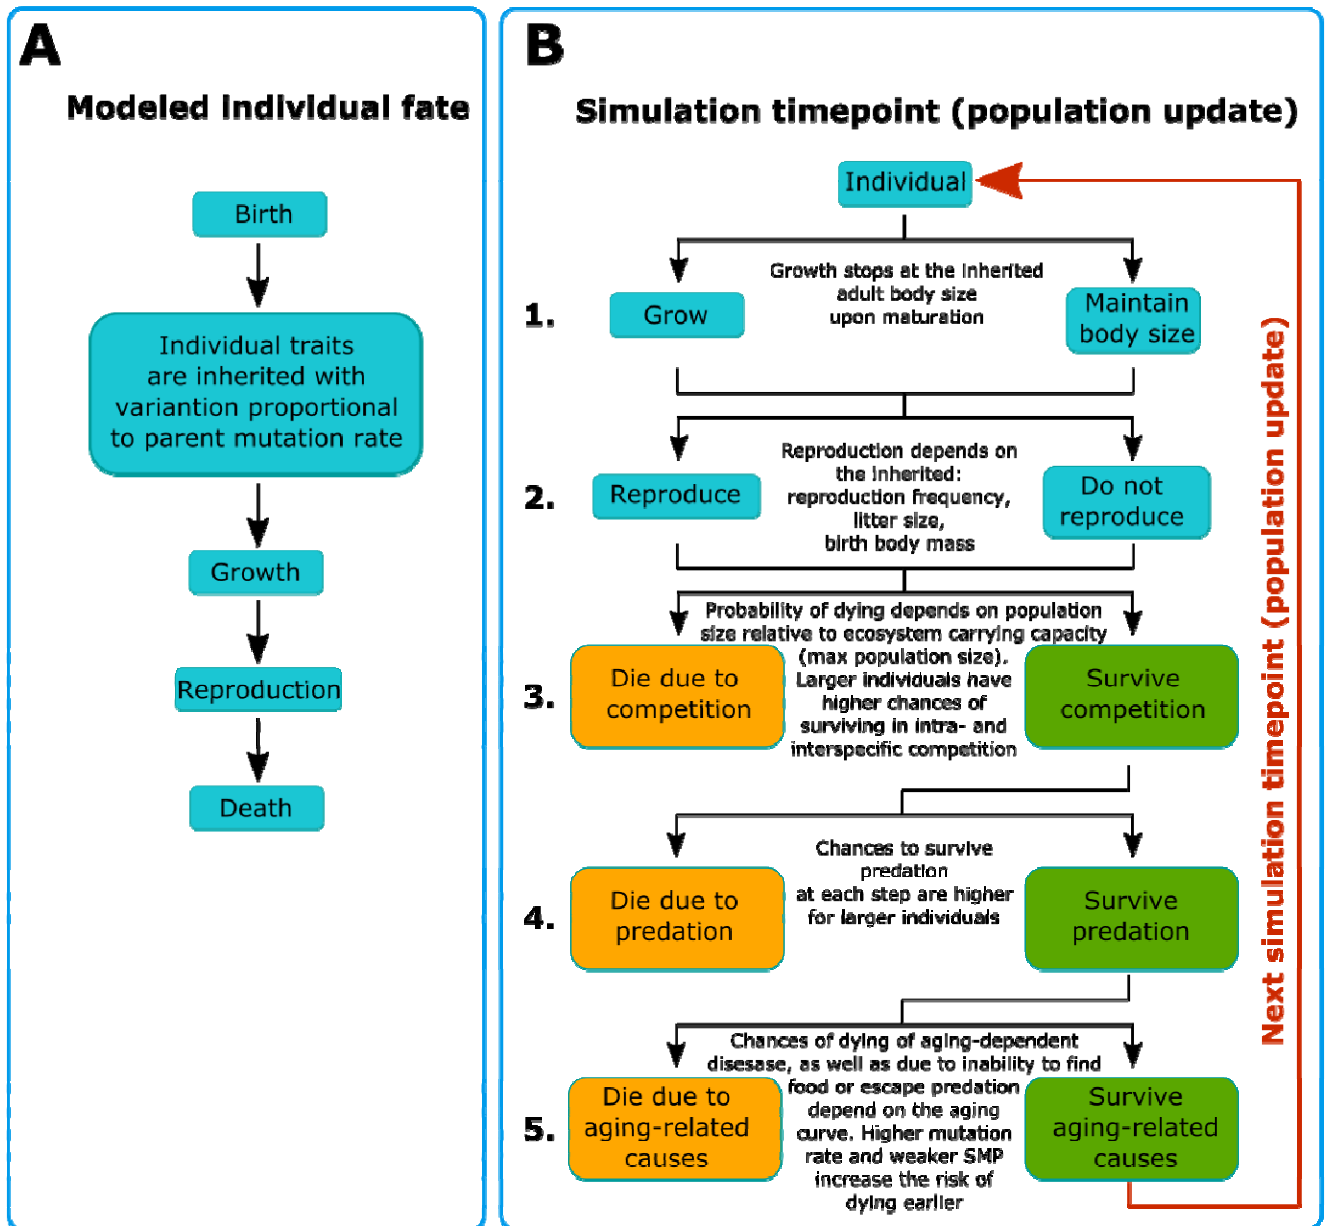

1457

1458 **Fig. 1. A scheme of the model simulations. (A)** Stages of an individual simulated lifespan. **(B)** At each  
 1459 timepoint during the simulation the modeled population undergoes 5 main updates: 1. Individuals that have not  
 1460 reached maturity increase their body mass following their growth curve, starting from the initial birth mass and up  
 1461 until they reach their inherited body mass (parent body mass with variation proportional to parent mutation rate);  
 1462 mature individuals remain at the same body mass. 2. Each individual past maturation reproduces with a certain  
 1463 inherited frequency of reproduction, producing on average an inherited number of progeny per litter, each  
 1464 progeny's birth body mass is inherited from parent with variation proportional to parent's mutation rate. Each

1465 individual is tried in a binomial trial with a small probability (at each timepoint) of dying of three main causes: 3.  
1466 Death following limitations imposed by ecosystem carrying capacity which allows for a certain maximum  
1467 population size and promotes intra-specific and inter-specific competition for resources if population numbers  
1468 exceed this capacity. 4. Death caused by predation is modelled based on the Lotka-Volterra model of predator-  
1469 prey interaction (34, 35). 5. Death caused by physiological aging, such as due to cancer, frailty or other age-  
1470 related causes; the probability is negligible early in life but increases exponentially with age; the speed of increase  
1471 of the probability of death caused by aging depends on an individual's aging profile which is determined by the  
1472 aging curve as explained in **Fig. 2A**, "Theoretical introduction to the modeling" subsection of **Results** and "The  
1473 somatic maintenance program paradigm" subsection of **Methods**.

1474

1475

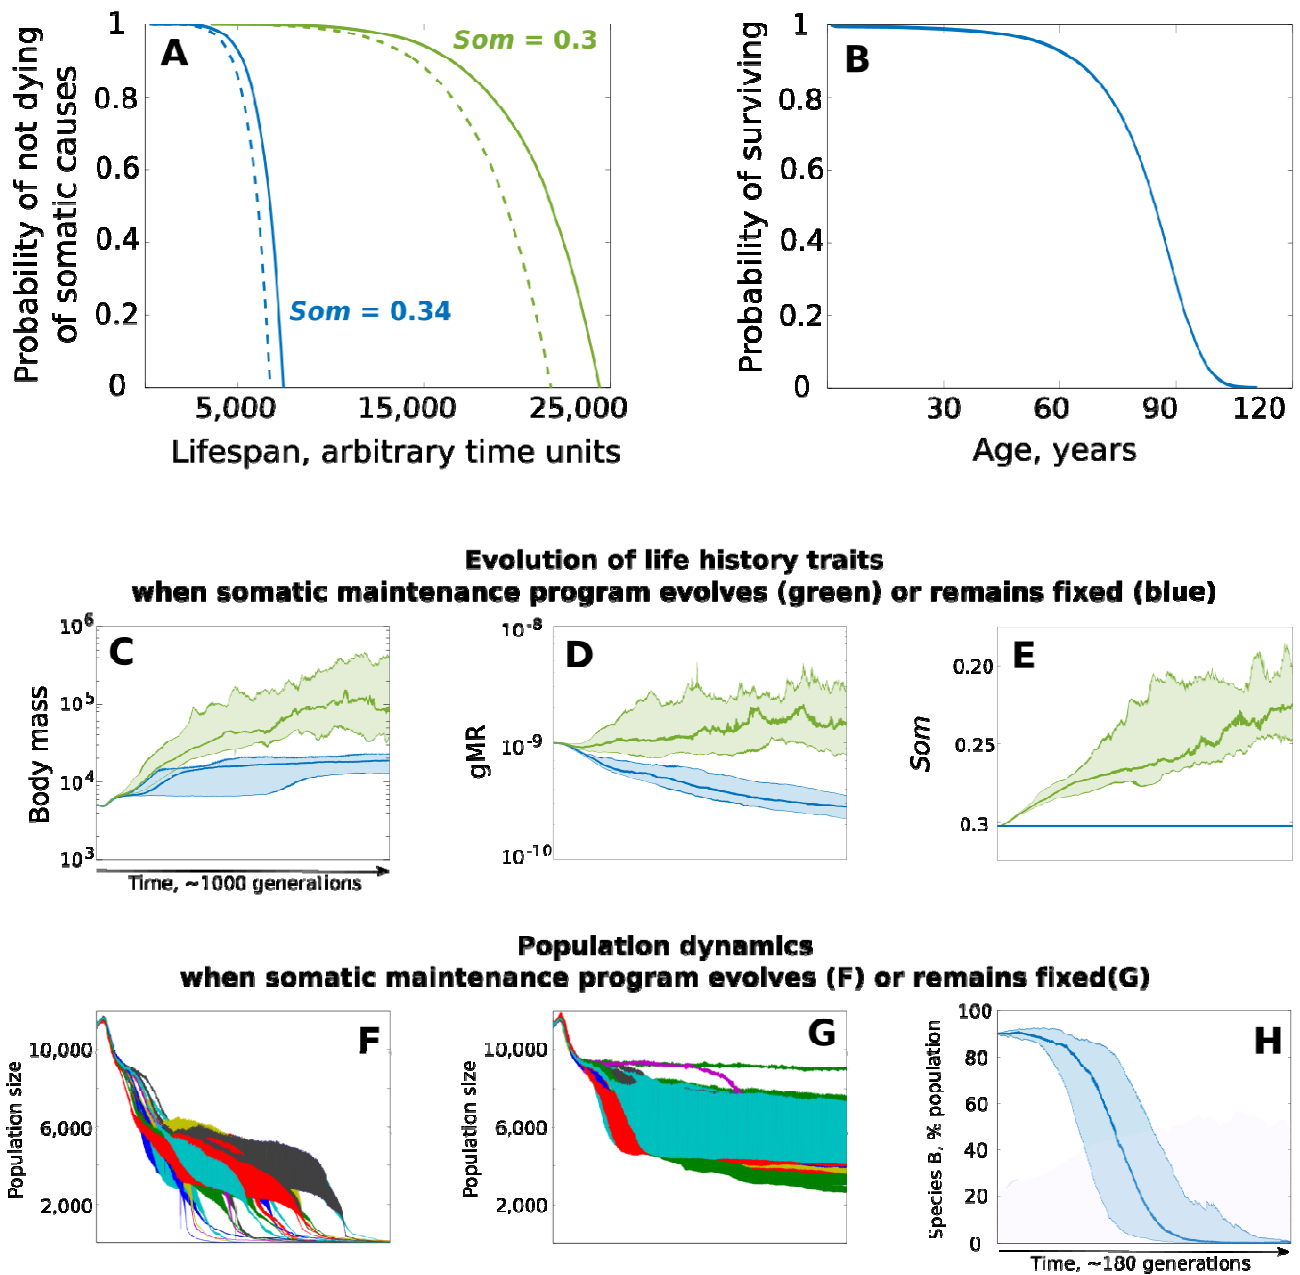

1476

1477 **Fig. 2. The effect of SMP evolution on the evolution of body mass and mutation rate.** (A) physiological/aging  
 1478 related mortality curves generated based on the cumulative distribution function of  $D_A$  (Eq. 1). Colors represent  
 1479 the effect of the *Som* (SMP) parameter (Eq. 1). Dotted lines were generated by elevating mutation rate 2-fold. (B)  
 1480 modern human mortality in the U.S.A (<https://www.ssa.gov>). (C-E) evolution of life history traits under positive  
 1481 selection for body size. (F,G) population size dynamics when SMP can evolve (corresponds to green in C-E) or  
 1482 SMP evolution is blocked (blue in C-E); colors indicate individual populations. (H) relative frequency of Species B  
 1483 (SMP evolution blocked, blue in C-E) in a mixed population with Species A (SMP can evolve, green in C-E). For



1484 (C), (D), (E) and (H) (and similar graphs in other figures), 25 simulations are combined, with the dark line  
1485 reflecting the mean and shaded area denoting the 95% confidence intervals.

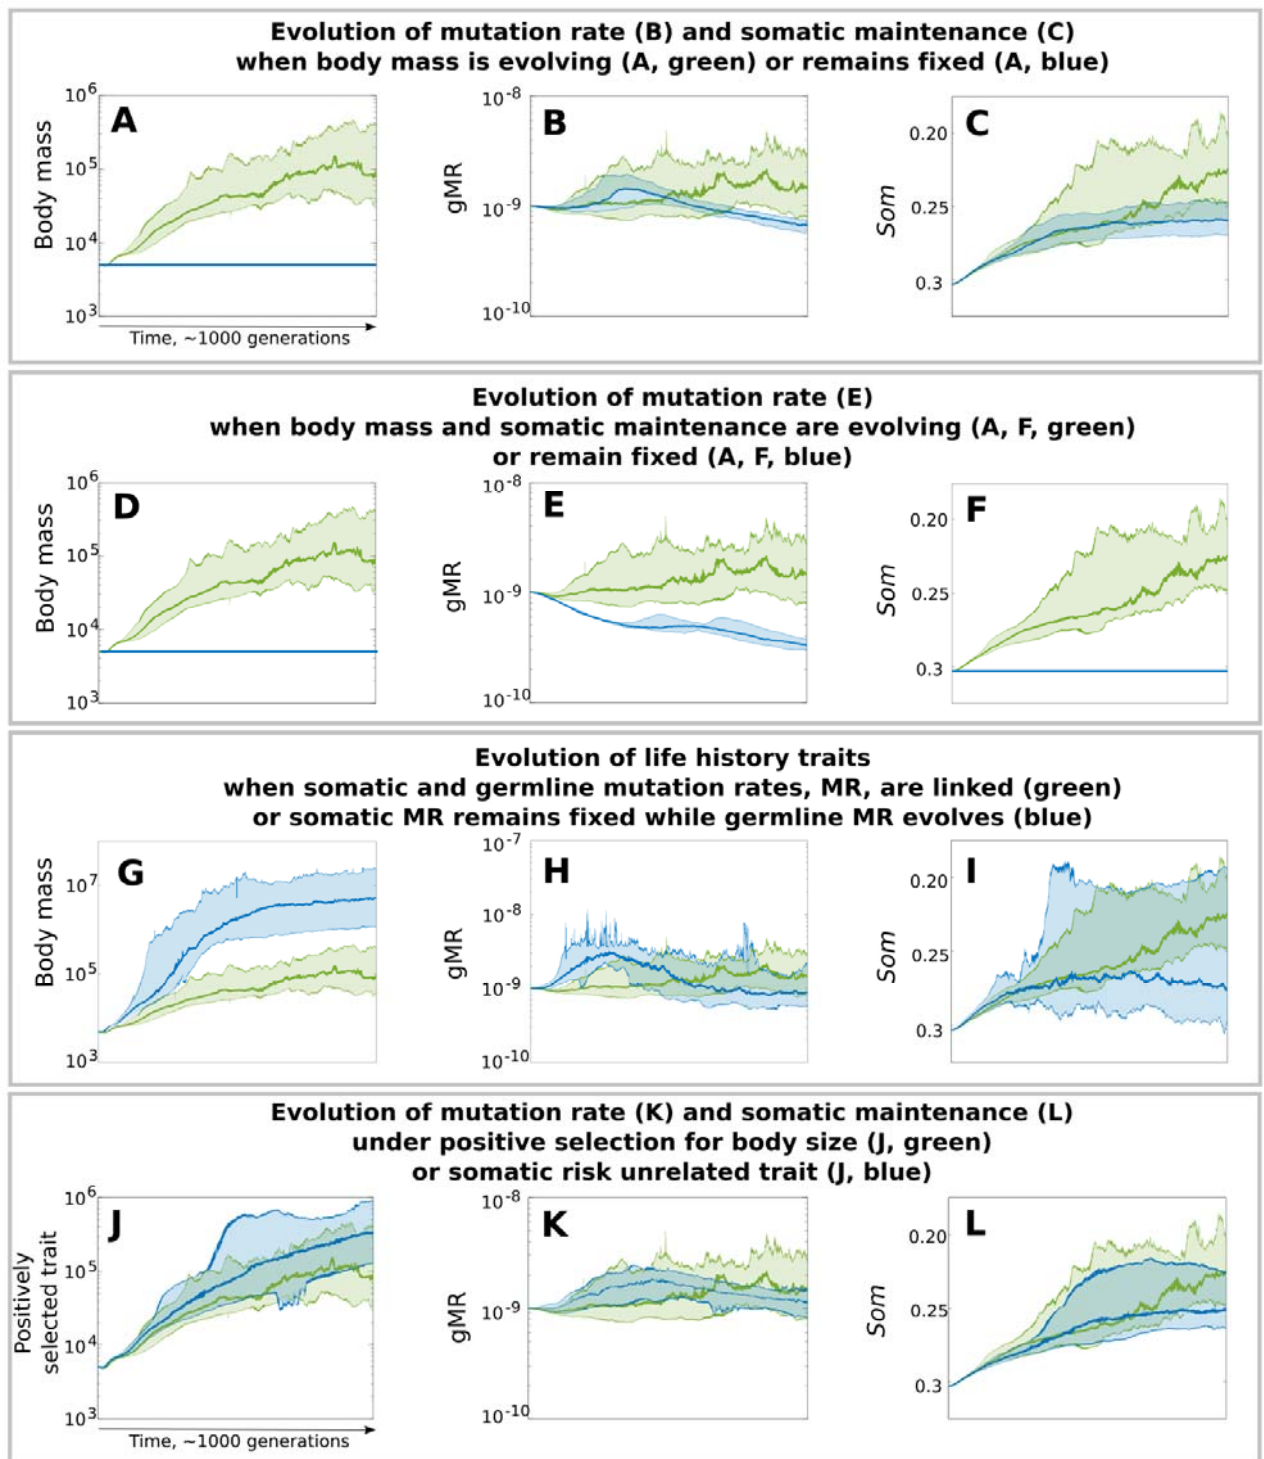

1486

1487 **Fig. 3. Evolution of body mass, gMR and SMP under various regimens of selection. Separate experiments**  
1488 **are stacked as indicated in their subtitles. The layout: left – body size, middle – gMR, right – SMP (the *Som***

1489 parameter in Eq. 1) is maintained as in Fig. 2C-E. Green – the standard condition (as green in Fig. 2C-E); blue –  
1490 alternative conditions with fixed values of a trait (blue horizontal line in *A, D, F*), when gMR and sMR are dislinked  
1491 so that the somatic cost is fixed while gMR can evolve (blue in G-I), and under selection for a somatic risk  
1492 unrelated trait (blue in *J-L*).

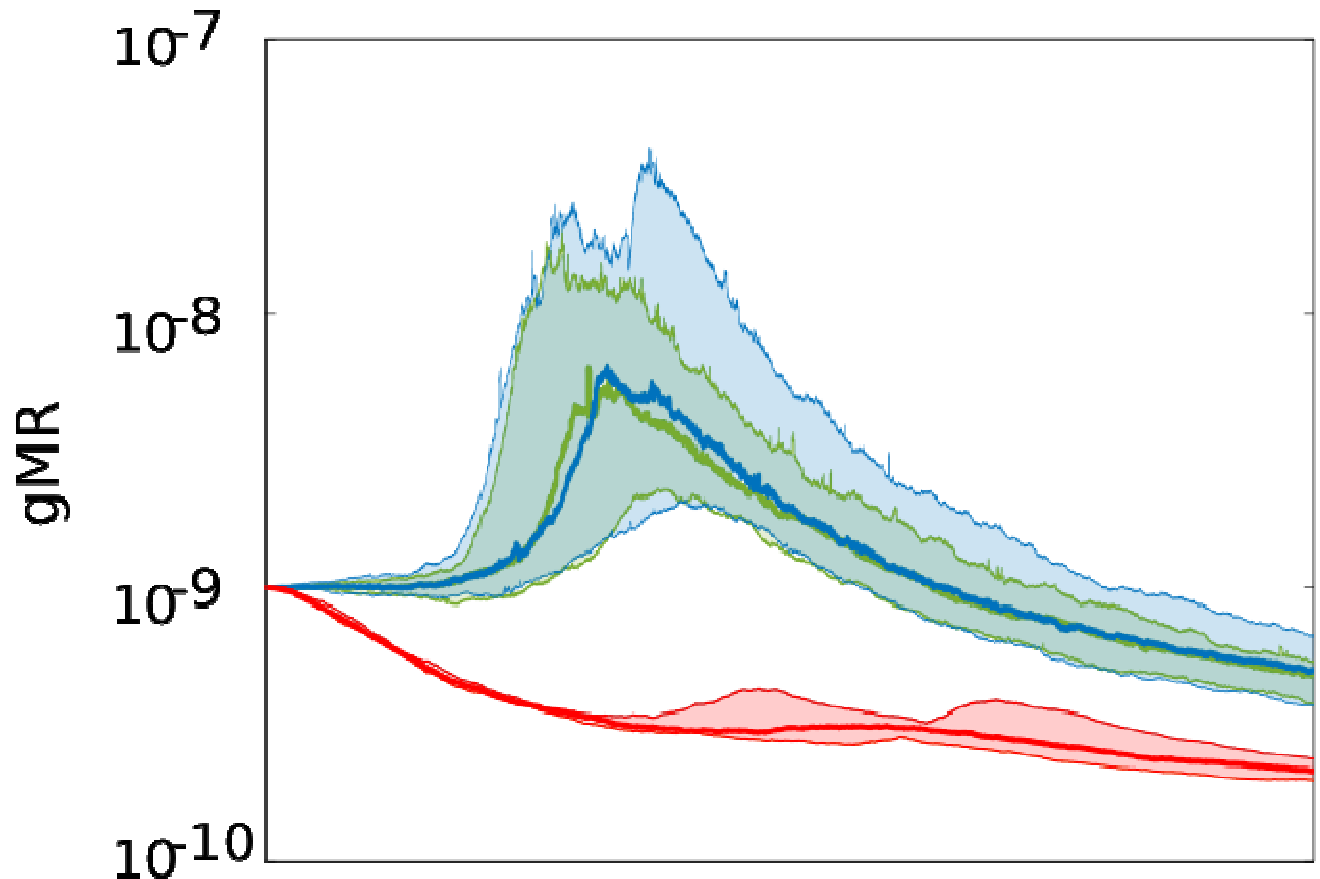

1493  
1494 **Fig. 4. The evolution of gMR in in the absence of positive selection for body mass and SMP. The SMP's**  
1495 *Som* parameter was fixed at 0.34 (red), 0.24 (green; enhanced 10X) and 0.2 (blue; enhanced 40X); a linear  
1496 decrease in the *Som* value results in a substantially improved SMP, so that the green SMP is ~10X more efficient  
1497 compared to red, and the blue is a ~4X more efficient SMP than the green. The standard (red) SMP leads to a  
1498 significantly stronger selection for lower gMR (non-overlapping 95% CIs); however, the absence of difference  
1499 between the 10X (green) and 40X (blue) improved SMPs indicates that overly improved SMPs might not provide  
1500 any further difference for how selection acts on gMR.

1501

1502

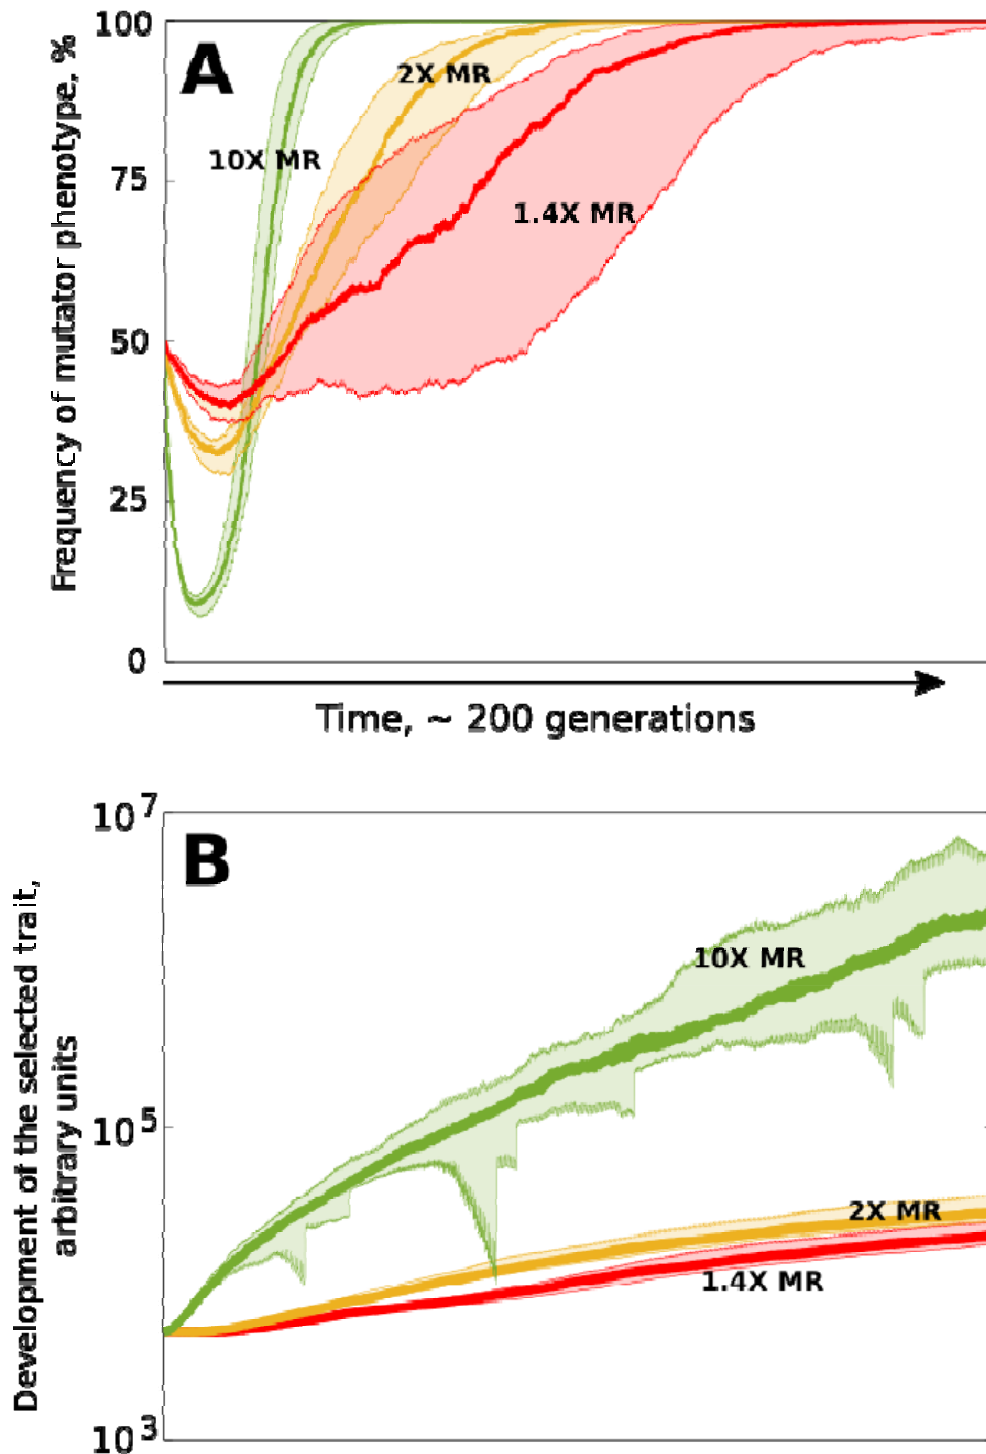

1503  
1504 Fig. 5. Positive selection for mutators. (A) frequency of a mutator phenotype in a mixed competitive  
1505 population with “wild-type” species. Red (1.4X), orange (2X) and green (10X) are mutators of different fold  
1506 increase in MR relative to the competitor as indicated by the respective numbers. (B) positive selection for a  
1507 somatic cost neutral trait demonstrates faster evolution (and so adaptation) of mutators. Colors and MR fold  
1508 increase as in (A).
